# Supplementary material for: Efficient precise integration of large DNA sequences with 3′-overhang dsDNA donors using CRISPR/Cas9
Source: PubMed Central journal article supplement — Proc Natl Acad Sci U S A. 2023 May 22;120(22):e2221127120. doi: 10.1073/pnas.2221127120 (PMC10235934; doi:10.1073/pnas.2221127120), 2023-05-22
Supplement: pnas.2221127120.sapp.pdf [file pnas.2221127120.sapp.pdf]

## Supplementary information for

### Efficient precise integration of large DNA sequences with 3'- overhang dsDNA donors using CRISPR/Cas9

Wenjie Han<sup>a,b</sup>, Zhigang Li<sup>b</sup>, Yijun Guo<sup>b</sup>, Kaining He<sup>b</sup>, Wenqing Li<sup>c</sup>, Caoling Xu<sup>c</sup>,  
Lishuang Ge<sup>b</sup>, Miao He<sup>b</sup>, Xue Yin<sup>b</sup>, Junxiang Zhou<sup>b</sup>, Chengxu Li<sup>b</sup>, Dongbao Yao<sup>b</sup>,  
Jianqiang Bao<sup>a,c\*</sup> and Haojun Liang<sup>a,b\*</sup>

<sup>a</sup>Hefei National Research Center for Physical Sciences at the Microscale, University of Science and Technology of China, Hefei, Anhui 230026, China.

<sup>b</sup>School of Chemistry and Materials Science, Department of Polymer Science and Engineering, CAS Key Laboratory of Soft Matter Chemistry, *iChEM* (Collaborative Innovation Center of Chemistry for Energy Materials), University of Science and Technology of China, Hefei, Anhui 230026, China.

<sup>c</sup>The First Affiliated Hospital of USTC, Biomedical Sciences and Health Laboratory of Anhui Province, School of Basic Medical Sciences, Division of Life Sciences and Medicine, University of Science and Technology of China, Hefei, Anhui 230001, China.

\*Corresponding authors: jqbao@ustc.edu.cn (J.B.); hjliang@ustc.edu.cn (H.L.).

This PDF file includes:

Figures S1 to S20

Tables S1 to S13

SI References

## Supplementary Figures

1. Testing of the maximum amount of dsDNA subjected to digestion by Lambda exonuclease.
2. Determination of EGFP expression background from donor templates.
3. Enhanced KI rate with 5'-PT-modified dsDNA donor templates.
4. Comparison of gene-sized (1010 bp) KI rates using odsDNA donors (40- and 50-nt overhangs) at two genomic loci in HEK293T cells.
5. A representative agarose gel image showing the recovered, newly synthesized ssDNA product in comparison to dsDNA for KI experiments.
6. Comparison of the KI rates for dsDNA donor and odsDNA donors with shorter HA lengths.
7. Comparisons of the KI rates for odsDNA donors with asymmetric overhangs.
8. Representative imaging of 1,110 bp donor KI at the *AAVS1* locus in HEK293T, HepG2, K562, and Jurkat cells by fluorescence microscopy.
9. Comparison of the cell viability and gene KI rates after nucleofection at *AAVS1* locus in HEK293T cells.
10. The nonlinear quadratic fitting curves showing the varied KI rates across different genomic loci with variable  $T_m$  of 3'-overhang of odsDNA.
11. Genomic PCR productions analysis of cells after gene KI.
12. Correct gene-sized target integration for junctions as visualized by agarose gel.
13. Sanger sequencing validation of the Junction PCR products at each locus after targeted gene KI in HEK293T cells.
14. Schematic diagram showing the reaction of Porcine Circovirus 2 (PCV2) with ssDNA.
15. Purification and activity detection in vitro of Cas9 and Cas9-PCV2 fusion proteins.
16. Design of the Cas-PCV2/linker-directed tethering of odsDNA donors under two different circumstances.
17. Enhanced KI efficiency with Cas9-PCV2 fusion protein-tethered 2,600 bp odsDNA donor with 10-nt overhangs.

18. Design of the 3' esgRNA for tethering the odsDNA donor to the DSB sites for improved target KI in two different scenarios.
19. Testing of KI efficiency and indels with esgRNA harboring variable lengths of OBS.
20. A general summary of steps for preparing GIS-seq library for paired-end analysis as modified from a previous protocol.

### **Supplementary Tables**

1. The list of sequences for CRISPR/Cas9 target sites tested in this study.
2. Sequences of the target insert in donor plasmids used as PCR templates in this study.
3. A list of primer sequences for preparing ssDNA, dsDNA and odsDNA donors (Including the odsDNA of asymmetric overhangs and odsDNA of HAs of 40bp and 20bp) through PCR amplification in this study.
4. A list of primer sequence for sgRNA or esgRNA synthesis in this study.
5. The template sequence of esgRNA was used in this study.
6. A list of primer sequence for genomic DNA PCR (full length and junctions) in this study.
7. A list of sequences for testing of Cas9-PCV2 ssDNA linkers.
8. The sequences of fluorescent ssDNA strands for labeling.
9. The plasmid sequence for Cas9-PCV2 fusion protein expression and purification.
10. The odsDNA overhang sequences tested for various loci and the corresponding  $T_m$  values.
11. The synthesized ssDNA sequences used for strand-annealing to form short dsDNA and odsDNA donors.
12. Primer sequences for indels detection by amplicon-seq analysis.
13. Primer sequences for off-target detection by GIS-seq.

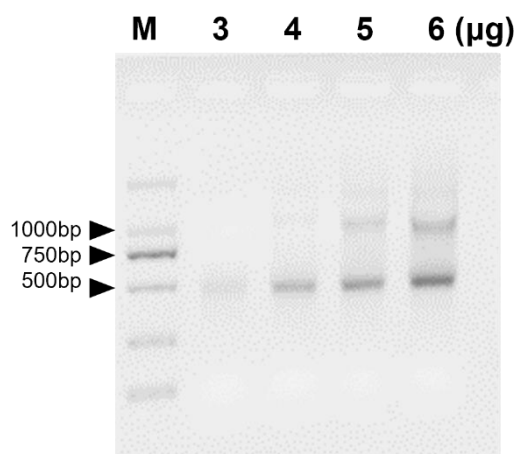

**Fig. S1. Testing of the maximum amount of dsDNA subjected to digestion by Lambda exonuclease.** The variable amounts of PCR-amplified dsDNA (1,110 bp), as indicated on top of each lane, without any modification, were subjected to digestion by 5 U Lambda exonuclease within 60 min. Noticeably, 3 µg of total 1,110 bp dsDNA were completely digested as evidenced by the disappearance of both ~1,110 bp and ~500 bp dsDNA bands within 60 min.

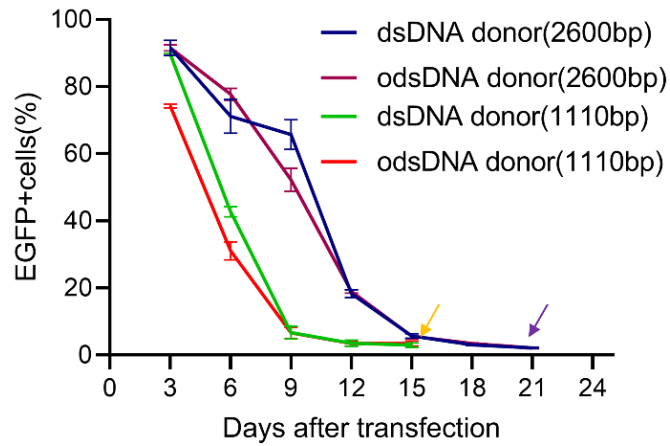

**Fig. S2. Determination of EGFP expression background from donor templates.**

Growing HEK293T cells were transfected with dsDNA or odsDNA donors from PCR-amplified plasmids with varying lengths in the absence of Cas9 RNPs. The percentages of EGFP-positive cells at different days post-transfection as indicated were recorded by flow cytometry. The post-transfection day 15 and 21, when the EGFP background intensities were considered as low as background levels, were selected for subsequent studies for 1,110 bp and 2,600 bp templates, respectively.

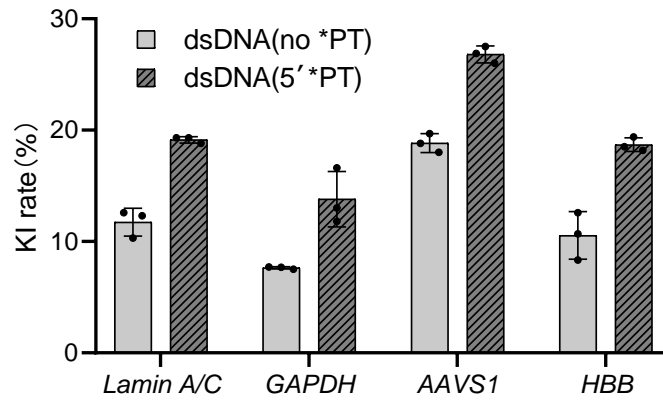

**Fig. S3. Enhanced KI rate with 5'-PT-modified dsDNA donor templates.** A side-by-side comparisons between dsDNA and 5'-PT-modified 1,110bp dsDNA donor templates (with 50bp homology arms on both sides) were performed for measuring KI efficiency across four selective genomic loci (*Lamin A/C*, *GAPDH*, *AAVS1*, and *HBB*). 5'-PT-modified donors constantly exhibited higher KI efficiencies than dsDNA donors without modification.

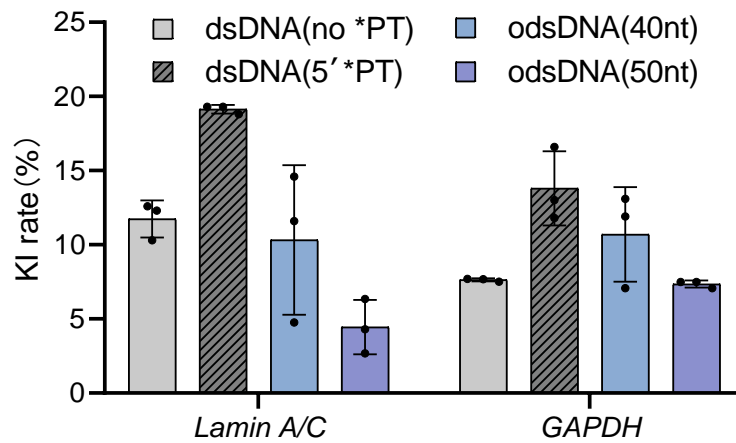

**Fig. S4. Comparison of gene-sized (1010 bp) KI rates using odsDNA donors (40- and 50-nt overhangs) at two genomic loci in HEK293T cells.** It revealed that odsDNA donors with longer overhangs (40- and 50-nt) exhibited similar, or even lower, KI rates, as compared with 5' PT-modified dsDNA donors (1).

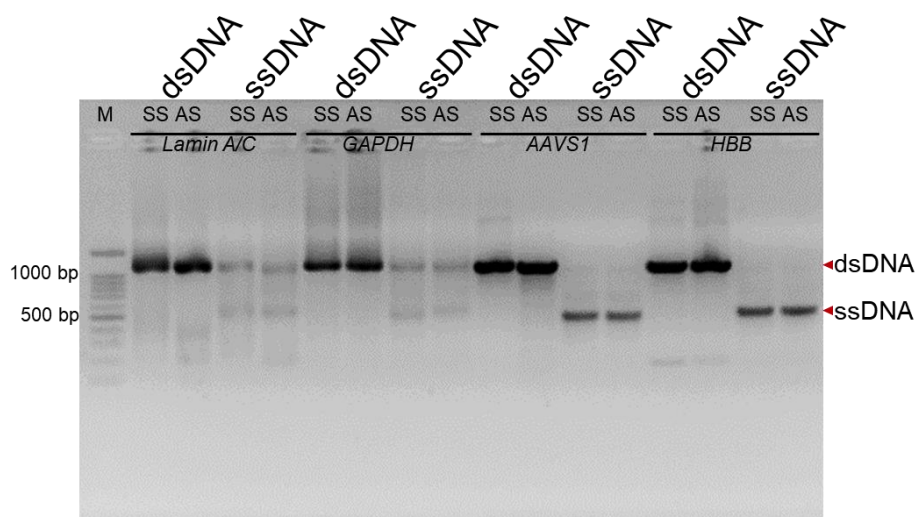

**Fig. S5.** A representative agarose gel image showing the recovered, newly synthesized ssDNA product in comparison to dsDNA for KI experiments.



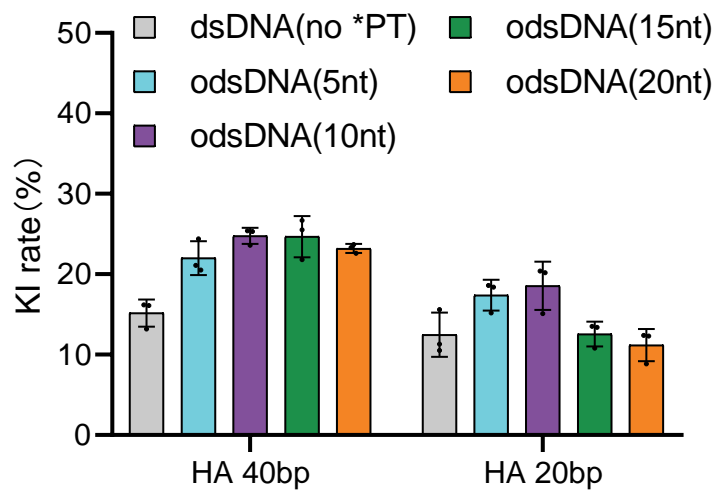

**Fig. S6. Comparison of the KI rates for dsDNA donor and odsDNA donors with shorter HA lengths (40 bp and 20 bp).**

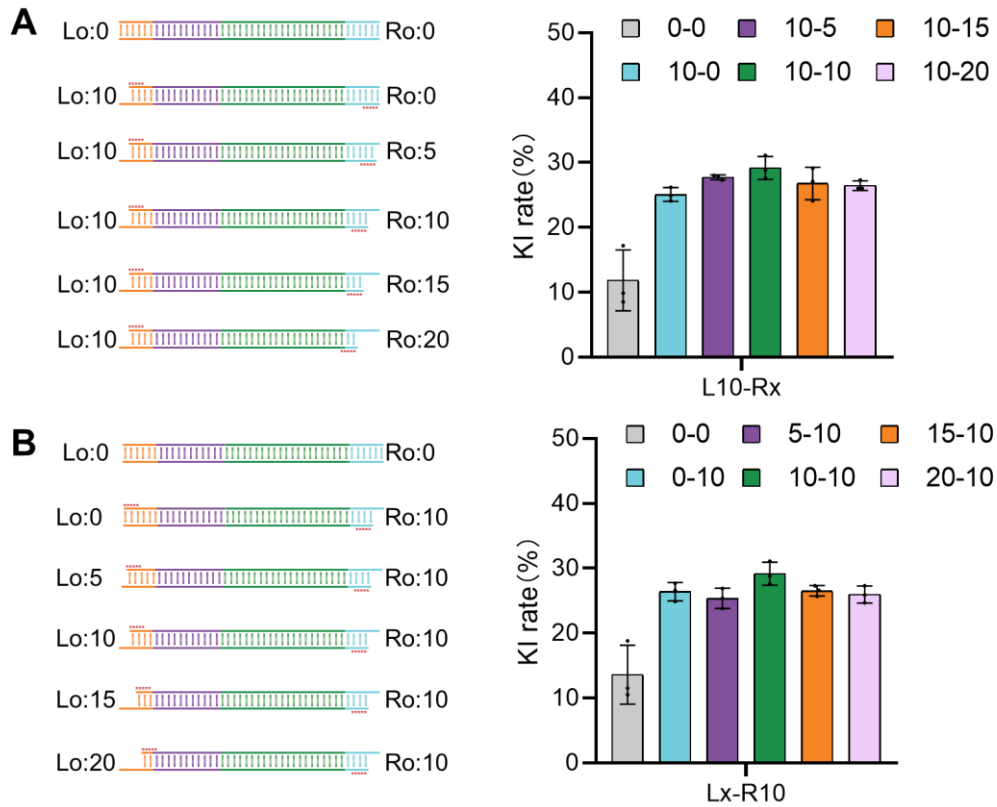

**Fig. S7. Comparisons of the KI rates for odsDNA donors with asymmetric overhangs. (A)** KI rates for odsDNA donors with 10-nt overhang at non-PAM end and the varying overhang lengths (5-, 10-, 15- and 20-nt) at PAM end. **(B)** KI rates for odsDNA donors with the 10-nt overhang at PAM end and the varying overhang lengths (5-, 10-, 15- and 20-nt) at non-PAM end. Lo, Left end of odsDNA; Ro, Right end of odsDNA.

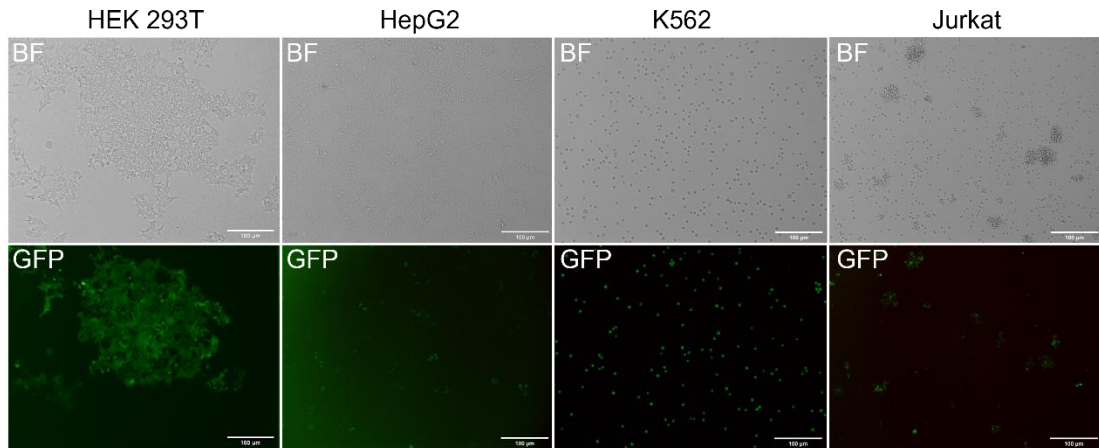

**Fig. S8. Representative imaging of 1,110 bp donor KI at the *AAVS1* locus in HEK293T, HepG2, K562, and Jurkat cells by fluorescence microscopy. The EGFP displayed high expression intensities at the *AAVS1* locus. BF, bright field. Image quantifications were performed with ImageJ. Scale bar=100 µm.**

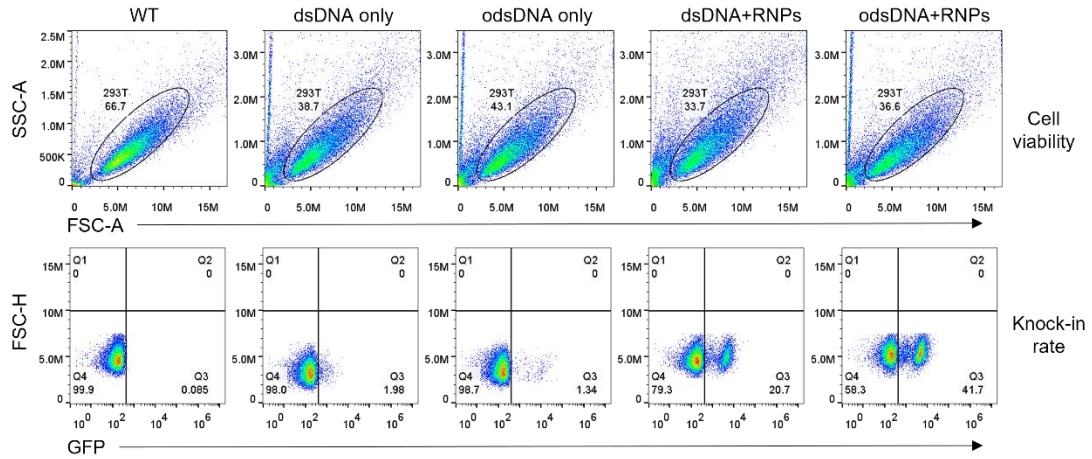

**Fig. S9. Comparison of the cell viability and gene KI rates after nucleofection at *AAVS1* locus in HEK293T cells.** Cell viability was determined by flow cytometry analysis three days after nucleofection, and the KI rate was examined on basis of the percentage of GFP-positive expression 15 days post-nucleofection. A representative flow cytometry plot was shown for each nucleofection group for donor-only or RNP transfections as indicated on the top of each panel. The RNP nucleofection containing the 10-nt 3'-overhang odsDNA demonstrated the highest KI rate (~42%), as compared to RNP/dsDNA complex (~19%).

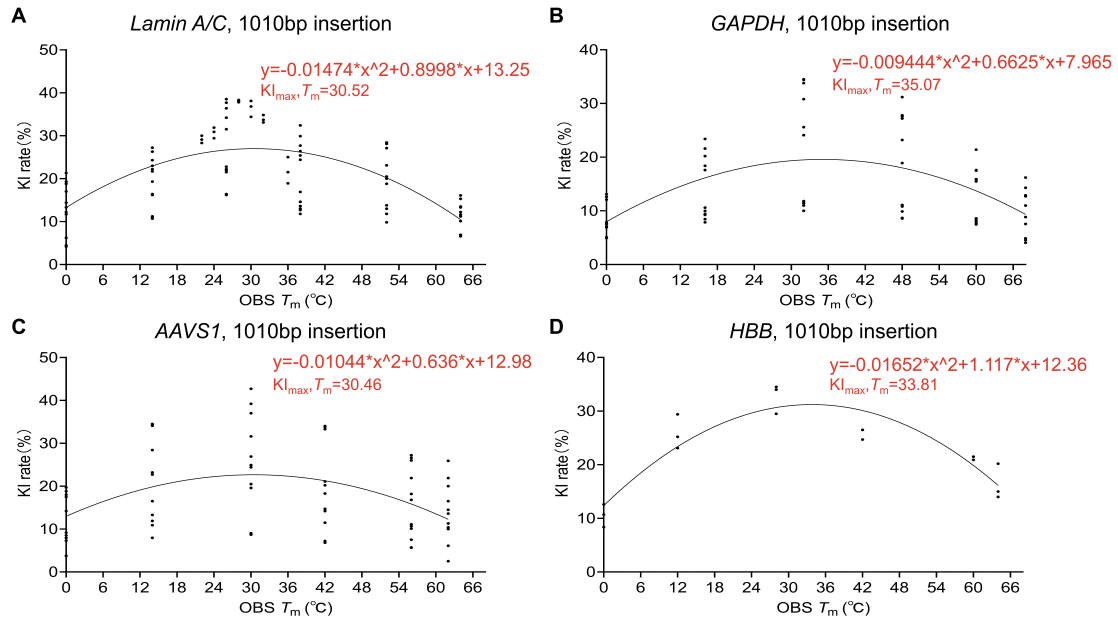

**Fig. S10.** The nonlinear quadratic fitting curves showing the varied KI rates across different genomic loci with variable  $T_m$  of 3'-overhang of odsDNA. The  $T_m$  was calculated based on the perfect base-pairing between 3'-overhang of the DSB and OBS in the odsDNA donor. All the odsDNA donors with 1,010 bp in length harbored 50 bp HAs on both ends and were designed against four genomic loci, including *Lamin A/C* locus (A), *GAPDH* locus (B), *AAVS1* locus (C) and *HBB* locus (D).



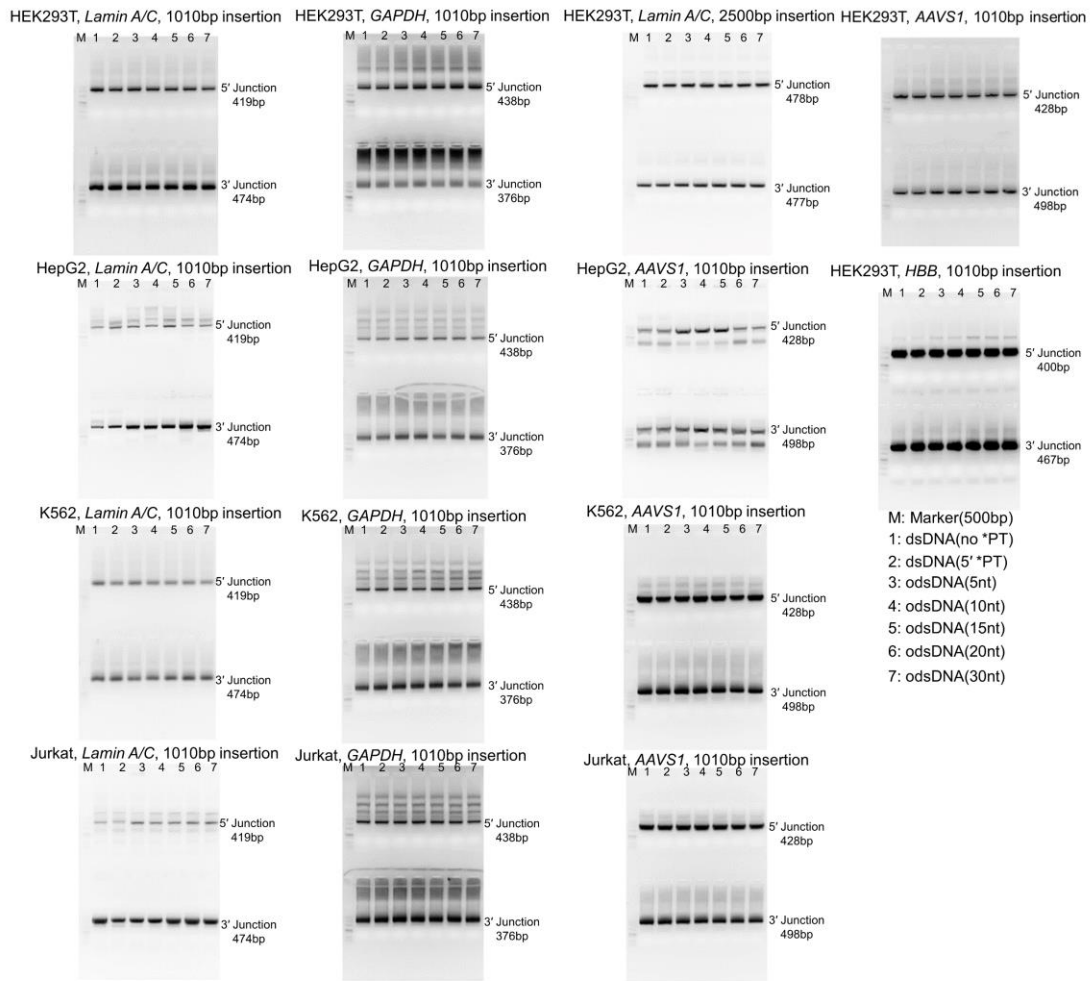

**Fig. S12. Correct gene-sized target integration for junctions as visualized by agarose gel.** The 1010-bp and 2500-bp donors (including dsDNA, 5'-end modified dsDNA, odsDNA with 5-nt, 10-nt, 15-nt, 20-nt and 30-nt overhangs, respectively) designed to target across four genomic loci (*Lamin A/C*, *GAPDH*, *AAVS1* and *HBB* loci) were co-delivered along with Cas9/sgRNA to the cell lines (HEK293T, HepG2, K562 and Jurkat cells). The junction PCR followed by 2% agarose gel electrophoresis was carried out to verify the correct target insertion.





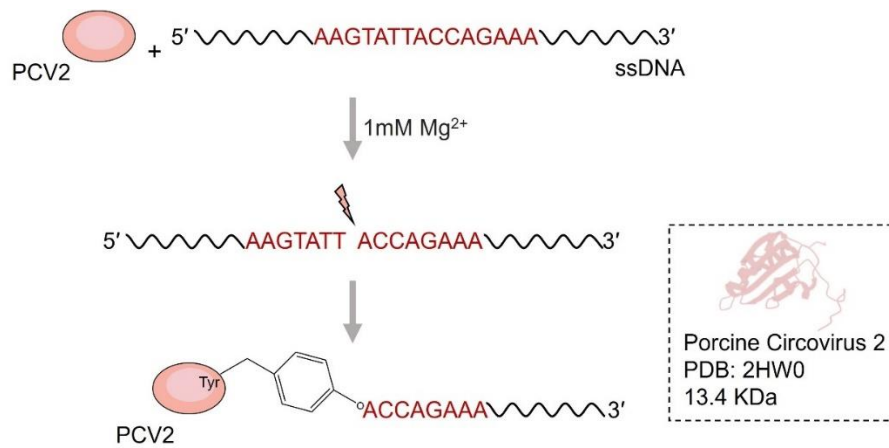

**Fig. S14. Schematic diagram showing the reaction of Porcine Circovirus 2 (PCV2) with ssDNA.** PCV2 recognizes and cleaves ssDNA containing motif sequence (AAGTATTACCAGAAA) in the presence of 1 mM Mg<sup>2+</sup>, and covalently attaches to the ssDNA (2).

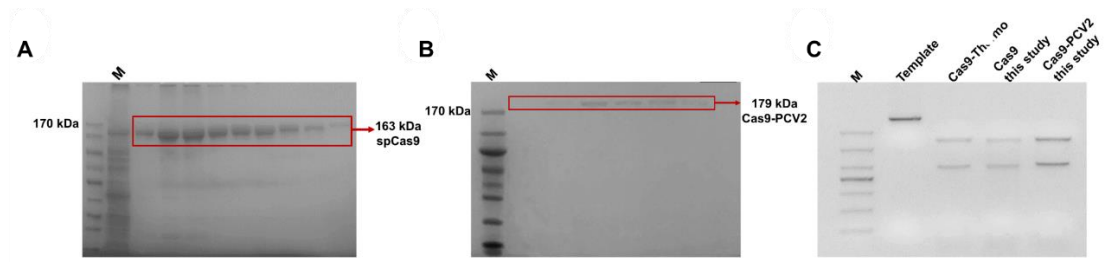

**Fig. S15. Purification and activity detection *in vitro* of Cas9 and Cas9-PCV2 fusion proteins.** (A) Verification of purified spCas9 protein by SDS-PAGE. (B) Verification of purified Cas9-PCV2 fusion protein by SDS-PAGE. (C) The DNA cleavage assay for the Cas9-PCV2 activity *in vitro* with a common DNA substrate.

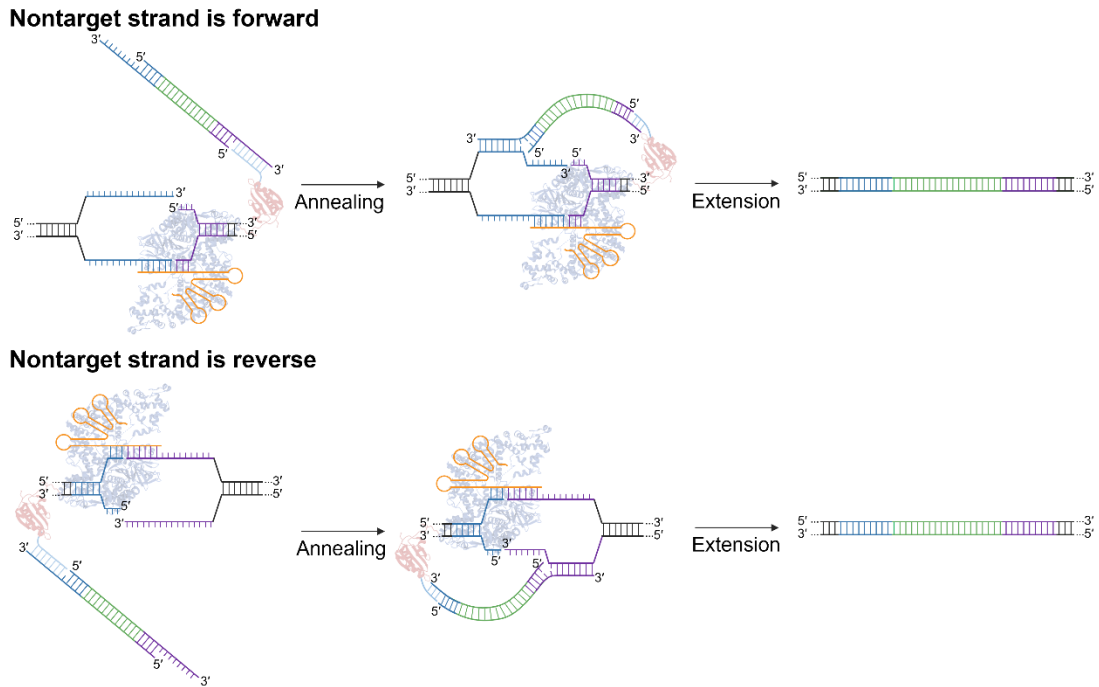

**Fig. S16. Design of the Cas-PCV2/linker-directed tethering of odsDNA donors under two different circumstances.** When the nontarget strand is at forward strand, Cas9-PCV2 attaches to the 3'-overhang (purple) on the right side of the odsDNA via PCV2-linker, and the nontarget strand without PAM (blue) anneals to the 3'-overhang (blue) on the left end of the odsDNA (upper panel). When the nontarget strand is at reverse strand, Cas9-PCV2 attaches to the 3'-overhang (blue) on the left side of the odsDNA via PCV2-linker, and the nontarget strand without PAM (purple) annealed to the 3'-overhang (purple) on the right end of the odsDNA (lower panel). The structure of Cas9 (no. 4CMP) and PCV2 (no. 2HW0) is adapted from PDB database.

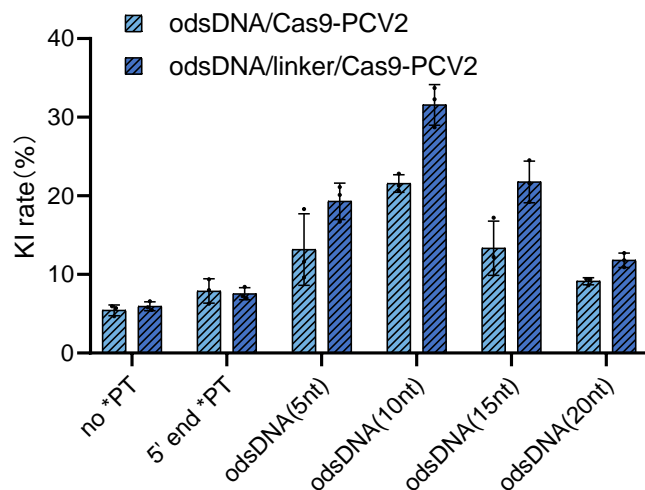

**Fig. S17. Enhanced KI efficiency with Cas9-PCV2 fusion protein-tethered 2,600 bp odsDNA donor with 10-nt overhangs.** Compared with non-tethered odsDNA donor, the Cas9-PCV2 tethered odsDNA donor, harboring 10-nt base-pairing between 3'-overhang of odsDNA and PCV2 linker, exhibited the highest KI efficiency. Of note, the KI rate varies with the variable length of overhangs.

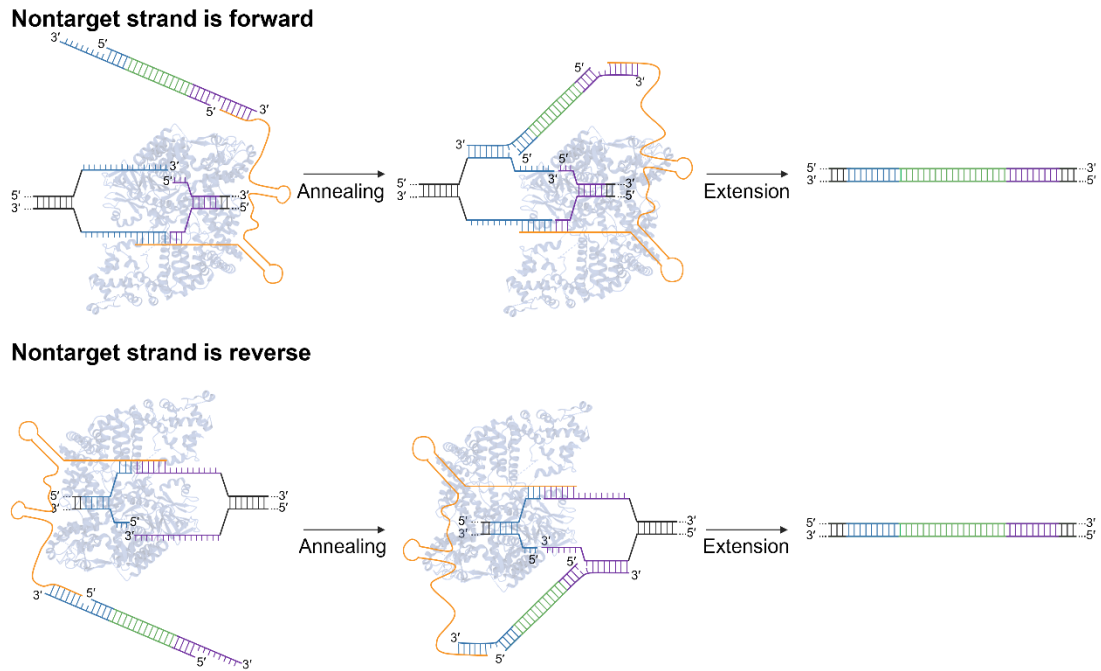

**Fig. S18. Design of the 3' esgRNA for tethering the odsDNA donor to the DSB sites for improved target KI in two different scenarios.** When the nontarget strand is at forward strand, esgRNA annealed to the 3'-overhang (purple) on the right side of the odsDNA, and the nontarget strand without PAM (blue) annealed to the 3'-overhang (blue) on the left end of the odsDNA. When the nontarget strand is at reverse strand, esgRNA annealed to the 3'-overhang (blue) on the left side of the odsDNA, and the nontarget strand without PAM (purple) annealed to the 3'-overhang (purple) on the right end of the odsDNA. The structure of Cas9 (no. 4CMP) from PDB database.

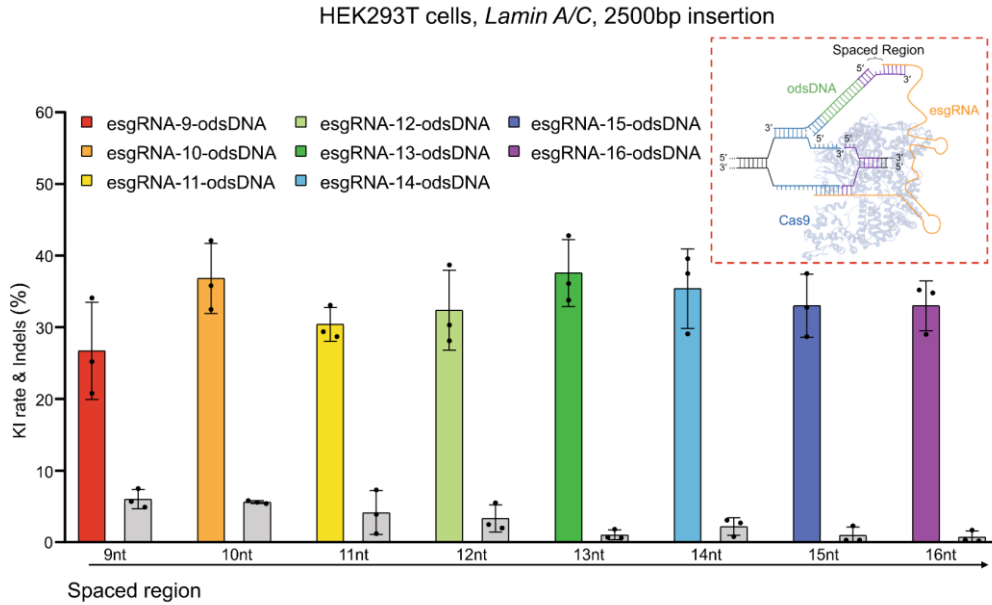

**Fig. S19. Testing of KI efficiency and indels with esgRNA harboring variable lengths of OBS.** For practical application, we designed a generic esgRNA with a fixed extended sequence consisting of OBS. The variable lengths of spaced region ranging from 23-nt to 16-nt in the 3'-overhang of odsDNA without base-pairing were selected for optimizing the precise KI insertion. The KI efficiencies were determined by the EGFP signal encoded by the 2,500 bp odsDNA donors. The indels frequencies were examined by TIDE pipeline analysis as described before. Gray bar are indels rates.

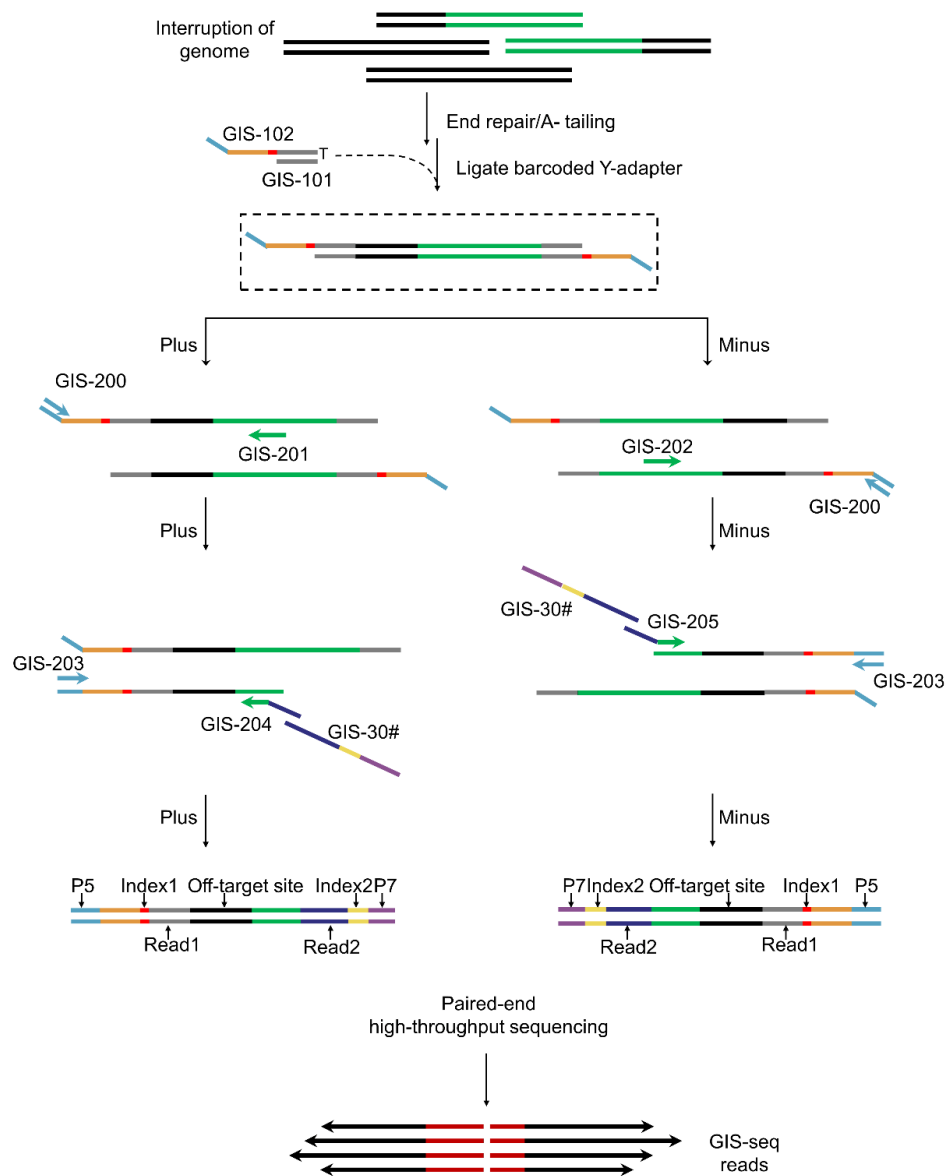

**Fig. S20. A general summary of steps for preparing GIS-seq library for paired-end analysis as modified from a previous protocol (3).** The gene-sized donors (dsDNA or odsDNA) were integrated into the host genomes by CRISPR RNP nucleofection. The genomic DNA was extracted and fragmented to an average of ~350 bp. After end-repair and A-tailing, the Y-shaped adapters were ligated to the genomic inserts. The target integration junctions were obtained by two rounds of nested PCR amplification, respectively, and the off-target sites were examined by NGS sequencing.

**Table S1.** The list of sequences for CRISPR/Cas9 target sites tested in this study. Four target sites were selected by CHOPCHOP software (<https://chopchop.cbu.uib.no/>). PAM sequences are underlined.

| Target sites                           | Target sequence             | Genomic location       | Strand | GC content (%) | Self-complementarity | MM0 | MM1 | MM2 | MM3 | Efficiency |
|----------------------------------------|-----------------------------|------------------------|--------|----------------|----------------------|-----|-----|-----|-----|------------|
| <i>Lamin A/C</i> locus                 | AGAGAAGTTATTT<br>TCTACAGTGG | Chr1:<br>15613925<br>5 | +      | 30             | 0                    | 0   | 0   | 1   | 16  | -          |
| <i>GAPDH</i> locus                     | AGCCCCAGCAAG<br>AGCACAAGAGG | Chr12:<br>6539186      | +      | 60             | 1                    | 0   | 6   | 9   | 26  | 49.17      |
| <i>PPP1R12C</i> ( <i>AAVS1</i> ) locus | ACAGTGGGGCCA<br>CTAGGGACAGG | Chr19:<br>55115754     | +      | 65             | 2                    | 0   | 0   | 1   | 5   | -          |
| <i>HBB</i> locus                       | CTTGCCCCACAG<br>GGCAGTAACGG | Chr11:<br>5226968      | -      | 60             | 2                    | 0   | 0   | 0   | 15  | 48.52      |

**Table S2.** Sequences of the target insert in donor plasmids used as PCR templates in this study. **Homology arm** (HA) sequences are highlighted in yellow.

| <i>Lamin A/C</i> locus donor sequence (EF-1 $\alpha$ core promoter-EGFP 1110bp)                                                                                                                                                                                                                                                                                                                                                                                                                                                                                                                                                                                                                                                                                                                                                                                                                                                                                                                                                                                                                                                                                                  |
|----------------------------------------------------------------------------------------------------------------------------------------------------------------------------------------------------------------------------------------------------------------------------------------------------------------------------------------------------------------------------------------------------------------------------------------------------------------------------------------------------------------------------------------------------------------------------------------------------------------------------------------------------------------------------------------------------------------------------------------------------------------------------------------------------------------------------------------------------------------------------------------------------------------------------------------------------------------------------------------------------------------------------------------------------------------------------------------------------------------------------------------------------------------------------------|
| <p>ctttggttttttctctgtattgttttctaagagaagttatttctataggtctttaaaggagtggtcaattggctccggtgcccgtagtgggcagag<br/> cgcacatcgcccacagtccccgagaagttggggggaggggtcggaattgatccggtgcctagagaaggtggcgcgggtaaacgggaaa<br/> gtgatgtcgtgactggctccgcttttcccagggtgggggagaaccgtatataagtgcagtagtcgccgtgaacgtttttcgcacggggtt<br/> gccgccagaacacaggaaacttgcaccatggtgagcaaggcgaggagctgttaccggggtggtgccatcctggtcgagctggacggc<br/> gacgtaaacggccacaagttcagcgtgtccggcgaggcgaggcgatgccacctacggcaagctgacctgaagtcatctgcaccaccgg<br/> caagctgccgtgcccctggcccacctcgtgaccacctgacctacggcgtgcagtgctcagccgctaccccaccacatgaagcagcag<br/> actcttcaagtcgccatgccgaaggctactgaccaggagcaccatcttctcaaggacgacggcaactacaagaccgcccagggtga<br/> agttcaggggcagaccctggtgaaccgcatcagctgaaggcactcactcaaggaggacggcaacatcctggggcacaagctggagta<br/> caactacaacgccacaacgtctatatcatggccgacaagcagaagaacggatcaaggtgaacttcaagatccgccacaacatcaggacg<br/> gcagcgtgagctcggcaccactaccagcagaacacccccatggcgacggccccgtgctgctgcccgacaaccactactgagcacca<br/> gtccgcccgtgagcaaaagacccaacgagaagcgcgatcacatggtcctgctggagttcgtgaccgcccgggatcactctggcatggacg<br/> agctgtacaagtaagactctggtcagagatacctcagtggtttatactgaaggaaaaaacacaagcaaaaaaaaaaaaaaagca</p>      |
| <i>GAPDH</i> locus donor sequence (EF-1 $\alpha$ core promoter-EGFP 1110bp)                                                                                                                                                                                                                                                                                                                                                                                                                                                                                                                                                                                                                                                                                                                                                                                                                                                                                                                                                                                                                                                                                                      |
| <p>atggctccaaggagtaagaccctggaccaccagccccagcaagagcacataggtctttaaaggagtggtcaattggctccggtgcccgtagt<br/> gtgggcagagcgcacatcgcccacagtccccgagaagttggggggaggggtcggaattgatccggtgcctagagaaggtggcgcggggt<br/> aaactgggaaagtgatgtcgtgactggctccgcttttcccagggtgggggagaaccgtatataagtgcagtagtcgccgtgaacgttttt<br/> cgcaacgggtttgccgccaacacaggaaacttgcaccatggtgagcaaggcgaggagctgttaccggggtggtgccatcctggtcg<br/> agctggacggcgacgtaaacggccacaagttcagcgtgtccggcgaggcgaggcgatgccacctacggcaagctgacctgaagttcat<br/> ctgcaccaccggcaagctcccgtgccctggcccacctcgtgaccacctgacctacggcgtgcagtgctcagccgctaccccaccacat<br/> gaagcagcagcacttctcaagtcgccatgccgaaggctactgaccaggagcaccatcttctcaaggacgacggcaactacaagaccg<br/> cgccgagtgaaagttcaggggcagaccctggtgaaccgcatcagctgaaggcactcactcaaggaggacggcaacatcctggggcac<br/> aagctggagtacaactacaacgccacaacgtctatatcatggccgacaagcagaagaacggatcaaggtgaacttcaagatccgccacaac<br/> atcgaggagcggcagcgtgagctcggcaccactaccagcagaacacccccatggcgacggccccgtgctgctgcccgacaaccactacc<br/> tgagcaccagtcgccctgagcaaaagacccaacgagaagcgcgatcacatggtcctgctggagttcgtgaccgcccgggatcactctc<br/> ggcatggcagagctgtacaagtaagactctggtcagagatacctaaagaggaagagagaccctactgctggggagtcctgccacacta</p> |



gt

*AAVSI* locus donor sequence (EF-1 $\alpha$  core promoter-EGFP 1110bp)

gttctgggtacttttatctgtccctccaccccacagtggggccaactaggtaggtcttgaaggagtggtcaattggctccggtgccgcagtggcagagcgcacatcgcccacagtccccgagaagttggggggaggggtcggcaattgatccggctagagaaggtggcggggtaaa  
ctgggaaagtgatgctgtactgctcccttttccgagggtgggggagaaccgtatataagtgcagtagtcgccgtgaacgttcttttcgc  
aacgggtttgccgccagaacacaggaagcttccaccatggtgagcaaggcggagagctgtaccggggtggtgccatctgtgcgagc  
tggacggcgacgtaaacggccacaagttcagcgtgtccggcgaggcggcggatgccacctacggcaagctgacctgaagtcatctgc  
accaccggcaagctgcccgtccctggcccaccctcgtgaccaccctgacctacggcgtgacgtgcttcagccgctaccccgaccatgaa  
gcagcacgacttctcaagtcgccatgcccgaaggctacgtccaggagcgcaccatcttcaaggacgacggcaactacaagaccgccc  
cgaggtgaagttcgaggcgcacacctggtgaaccgcatcgagctgaaggcagcactcaaggagacggcaacatctggggcacaag  
ctggagtacaactacaacagccacaacgtctatatacatggccgacaagcagaagaacggcatcaaggtgaactcaagatccgccacaacatc  
gaggacggcagcgtgacgtcgtccgacctaccagcagaacacccccatcgggcagggccccgtgctgctgcccgacaaccactacctga  
gcaccagtcgccctgagcaagacccaacgagaagcgcgatcacatggtctgctgagttcgtgaccgccggggatcaactctcggc  
atggacgagctgtacaagtaagactctggtcagagatactgacaggattggtgacagaaaagccccatccttaggcctccttctcta

*HBB* locus donor sequence (EF-1 $\alpha$  core promoter-EGFP 1110bp)

tcaaacagacacattggtgcatctgactcctgaggagaagctgccgtaataggtcttgaaggagtggtcaattggctccggtgccgcagtgggagagcgcacatcgcccacagtccccgagaagttggggggaggggtcggcaattgatccggctagagaaggtggcggggtaa  
actgggaaagtgatgctgtactgctccgcttttccgagggtgggggagaaccgtatataagtgcagtagtcgccgtgaacgttcttttcg  
caacgggtttgccgccagaacacaggaagcttccaccatggtgagcaaggcggagagctgtaccggggtggtgccatctgtgcgag  
ctggacggcgacgtaaacggccacaagttcagcgtgtccggcgaggcggcggatgccacctacggcaagctgacctgaagttcatctg  
caccaccggcaagctgcccgtgccctggcccaccctcgtgaccacctgacctacggcgtgacgtgcttcagccgctaccccgaccatgaa  
gcagcacgacttctcaagtcgccatgcccgaaggctacgtccaggagcgcaccatcttcaaggacgacggcaactacaagaccgccc  
cgaggtgaagttcgaggcgcacacctggtgaaccgcatcgagctgaaggcagcactcaaggagacggcaacatctggggcacaag  
ctggagtacaactacaacagccacaacgtctatatacatggccgacaagcagaagaacggcatcaaggtgaactcaagatccgccacaacatc  
gaggacggcagcgtgacgtcgtccgacctaccagcagaacacccccatcgggcagggccccgtgctgctgcccgacaaccactacctga  
gcaccagtcgccctgagcaagacccaacgagaagcgcgatcacatggtctgctgagttcgtgaccgccggggatcaactctcggc  
atggacgagctgtacaagtaagactctggtcagagatactctgccctgtggggcaaggtgaacgtggatgaagttggtggtgagggcctg

*Lamin A/C* locus donor sequence (EF-1 $\alpha$  promoter-EGFP 2600bp)

ctttggtttttctctgtattttcttaagagaagttattttctatgccggcgagagatcacgtggggcgggagggcgtgctgctggggcagc  
gcccgtccagcctcggcggccatattttgaggggctgttcctctgctcacacgctctgtccgcatgtttgtgagtggaagcgcattacccttca  
agcagctgaaggctgcaggcctctggtggcccgatggggagaccagaccgccaggcccccttccgactcagtcgggcttattat  
tttgtgagacagggctcgcctagaggtcggctgcccgtcagtgggcagagcgcacatcgcccacagtccccgagaagttggggggaggg  
gtcggcaattgaaccggctgactagagaagtgccggcgggfaaactgggaaagtgtgctgtactggctccgcttttccgagggtgggg  
gagaaccgtatataagtgcagtagtcgccgtgaacgttcttttgcacgggttggccgagaacacagtaagtgccgtgtgtggttcccgcg  
ggcctggccttctacgggttatggcccttgcgtcctgaattactccacgccctggctgacgtgattctgatcccagcttccgggttg  
aagtgggtgggagagttcagggcctgcgcttaaggagcccccttgcctcgtgctgagttgaggtggcctggcgctggggcccgccgt  
gcgaatctggtggcacctcgcgctgtctcgtcttgcataagctctagccattaaaattttgatgacctgtgcgacgctttttctggcaag  
atagcttgaatgcgggcaagatctgcacactggtatttgggttttggggcggggcggcgacggggcccgtgctcccagcgcacatg  
ttcggcgagggggcctcgcagcggccaccgagaatcgagggggtagtctcaagctggccgctgctggtgctcggcctcgcg  
ccgccgtgatcggccgctggcggcaaggctggcccgtcggcaccagttgcgtgagcggaaagatggccgctcccggcctcgtg  
cagggagctcaaaatggaggacgcggcgtcgggagagcggcggggtgagtcaccacacaaggaagggccttccgctcagccg  
tccttcatgtactccagagtagccggcgtccaggcacctcgattagttctcagcttttgagtagctgctttaggttggggggagg  
ggtttatgcatgaggtttcccatactgagtggtgggactgaagttaggccagcttggcacttgatgaattccttgaattgcccttttga  
gtttgacttggctcattctcaagcctcagacagtggttcaaagtttttcttccattaaaggtgctgtaaaaactacccaagctggcctctgaggc

caccatggctgtgagcaagggcgaggagctgttcaccggggtgggcccacatcctggctgagctggacggcgacgtaaacggccacaagtca  
 gctgtccggcgagggcgagggcgatgccacctacggcaagctgacctgaagttcatctgcaccaccggcaagctgcccgtgcccctggcc  
 caccctctgaccacctgacctacggcgtgagtgcttcagccctaccccaccacatgaagcagcagcactcttcaagtcgcccctgccc  
 gaaggctactgccaggagcgcaccatcttctcaaggacgacggcaactacaagaccgcccggaggtgaagttcgagggcgacaccctggt  
 gaaccgcatcgagctgaagggcatcgacttcaaggaggacggcaacatcctggggcacaagctggagtacaactacaacagccacaacgtct  
 atatcatggccgacaagcagaagaacggcatcaaggtgaactcaagatccgccacaacatcgaggacggcagcgtgacgctgcccacca  
 ctaccagcagaacacccccatggcgacggccccgtgctgctgcccgacaaccactacctgagcaccagtcgccctgagcaagacccc  
 aacgagaagcgcgatcacatggtcctgctggagttcgtgaccgccgggatcactctggcatggacgagctgtacaagtaaaagctggg  
 gatcaattctctagagctcgctgacgctcgtgcttctagttgccaccatctgtttgcccctccccctgcttctgacctggaa  
 ggtgccactcccactgcttctcaataaaatgaggaaattgcatcgattgctgagtaggtgtcattctattctggggggtggggggggcagg  
 acagcaagggggaggattggaagacaatagcaggcatgctgggatcggtgggctctatggcttctgaggcggaaaagaccagctgggc  
 ccagtggtttatactgaaggaaaaacacaagcaaaaaaaaaaaaaaagca

**Table S3.** A list of primer sequences (5' → 3') for preparing ssDNA, dsDNA and odsDNA donors through PCR amplification in this study. “\*” represents phosphorothioate (PT) modification, “P” represents phosphorylation modification.

| <i>Lamin A/C</i> locus | EF-1α core promoter-EGFP (1110bp) primers or EF-1α promoter-EGFP-ploy A signal (2600bp) primers |
|------------------------|-------------------------------------------------------------------------------------------------|
| L50-0-F                | ctttggttttttctctgtattgttttctaagagaagtattttcta                                                   |
| L50-0-P-R              | P-tgctttttttttttgcttggttttccttcagtataaac                                                        |
| L50-0-P-F              | P-ctttggttttttctctgtattgttttctaagagaagtattttcta                                                 |
| L50-0-R                | tgctttttttttttgcttggttttccttcagtataaac                                                          |
| L-50-F                 | ctttggttttttctctgtattgttttctaagagaagtattttctaTAGGTCTTGAA<br>AGGAGTGGG                           |
| L-50-R                 | tgctttttttttttgcttggttttccttcagtataaaaccactgAGGTATCTCTG<br>ACCAGAGTC                            |
| L-50S-F                | ctttggttttttctctgtattgttttctaagagaagtattttctaT*A*G*G*T*CT<br>TGAAAGGAGTGGG                      |
| L-50S-R                | tgctttttttttttgcttggttttccttcagtataaaaccactgA*G*G*T*A*TC<br>TCTGACCAGAGTC                       |
| L-40S-F                | ctttggttttttctctgtattgttttctaagagaagt*t*a*t*t*ttctaTAGGTCTT<br>GA                               |
| L-40S-R                | tgctttttttttttgcttggttttccttcagtata*a*a*a*c*cactgAGGTATC<br>TCT                                 |
| L-30S-F                | ctttggttttttctctgtattgttttc*t*a*a*g*agaagtattttcta                                              |
| L-30S-R                | tgctttttttttttgcttggttttc*c*t*t*c*agtataaaaccactg                                               |
| L-20S-F                | ctttggttttttctctgta*t*t*t*g*ttttctaagagaag                                                      |
| L-20S-R                | tgctttttttttttgct*t*g*t*g*ttttccttcagtat                                                        |
| L-15S-F                | ctttggttttttct*c*t*g*t*attgttttctaag                                                            |
| L-15S-R                | tgctttttttttt*t*t*g*c*ttgtttttccttc                                                             |
| L-14S-F                | ctttggttttttct*t*c*t*g*t                                                                        |

|          |                                                      |
|----------|------------------------------------------------------|
| L-14S-R  | tgcctttttttttt*t*t*t*g*c                             |
| L-13S-F  | ctttggtttttttc*t*t*c*t*gt                            |
| L-13S-R  | tgcctttttttttt*t*t*t*t*gc                            |
| L-12S-F  | ctttggttttttt*c*t*t*c*t*gt                           |
| L-12S-R  | tgcctttttttttt*t*t*t*t*t*gc                          |
| L-11S-F  | ctttggtttttt*t*c*t*t*ctgt                            |
| L-11S-R  | tgcctttttttttt*t*t*t*t*t*gc                          |
| L-10S-F  | ctttggttttt*t*t*c*t*tctgtattgtttt                    |
| L-10S-R  | tgcctttttttt*t*t*t*t*tttgccttggtttt                  |
| L-9S-F   | ctttggtttt*t*t*t*c*ttctgt                            |
| L-9S-R   | tgcctttttt*t*t*t*t*tttgc                             |
| L-8S-F   | ctttggttt*t*t*t*t*cttctgt                            |
| L-8S-R   | tgcctttttt*t*t*t*t*tttgc                             |
| L-5S-F   | ctttgg*t*t*t*t*tttctctgtattg                         |
| L-5S-R   | tgcctt*t*t*t*t*ttttttgcttg                           |
| L40-0-F  | tttctctgtattgttttctaagagaagtattttcta                 |
| L40-0-R  | ttttttgcttggttttccctcagtataaaaccactg                 |
| L40-5-F  | tttctt*c*t*g*t*attgttttctaagagaagtattttcta           |
| L40-5-R  | ttttt*t*t*g*c*ttgttttccctcagtataaaaccactg            |
| L40-10-F | tttctctgta*t*t*t*g*ttttctaagagaagtattttcta           |
| L40-10-R | ttttttgct*t*g*t*g*ttttccctcagtataaaaccactg           |
| L40-15-F | tttctctgtattgt*t*t*t*t*ctaagagaagtattttcta           |
| L40-15-R | ttttttgcttggt*t*t*t*t*cctcagtataaaaccactg            |
| L40-20-F | tttctctgtattgttttc*t*a*a*g*agaagtattttcta            |
| L40-20-R | ttttttgcttggttttc*c*t*t*c*agtataaaaccactg            |
| L20-0-F  | ctaagagaagtattttctaTAGGTC                            |
| L20-0-R  | cctcagtataaaaccactgAGGTAT                            |
| L20-5-F  | ctaaga*g*a*a*g*ttattttctaTAGGTC                      |
| L20-5-R  | cctca*g*t*a*t*aaaaccactgAGGTAT                       |
| L20-10-F | ctaagagaagt*t*a*t*t*ttctaTAGGTC                      |
| L20-10-R | cctcagtata*a*a*a*c*cactgAGGTAT                       |
| L20-15-F | ctaagagaagttatt*tctaTAGGTC                           |
| L20-15-R | cctcagtataaaacc*a*c*t*g*AGGTAT                       |
| L20-20-F | ctaagagaagttattttctaT*A*G*G*T*C                      |
| L20-20-R | cctcagtataaaaccactgA*G*G*T*A*T                       |
| L50-10-F | ctttggttttt*t*t*c*t*tctgtattgttttctaagagaagtattttcta |
| L50-0-R  | t*g*c*t*t*t*tttttttttgccttggttttccctcagtataaaac      |
| L50-10-F | ctttggttttt*t*t*c*t*tctgtattgttttctaagagaagtattttcta |
| L50-5-R  | tgcctt*t*t*t*t*ttttttgcttggttttccctcagtataaaac       |
| L50-10-F | ctttggttttt*t*t*c*t*tctgtattgttttctaagagaagtattttcta |
| L50-10-R | tgccttttttt*t*t*t*t*tttgccttggttttccctcagtataaaac    |

|                    |                                                                               |
|--------------------|-------------------------------------------------------------------------------|
| L50-10-F           | ctttgggtttt*t*t*c*t*tctgtattgttttctaagagaagttatttcta                          |
| L50-15-R           | tgcctttttttttt*t*t*g*c*ttgtgttttccttcagtataaaac                               |
| L50-10-F           | ctttgggtttt*t*t*c*t*tctgtattgttttctaagagaagttatttcta                          |
| L50-20-R           | tgcctttttttttttgct*t*g*t*g*ttttccttcagtataaaac                                |
| L50-0-F            | c*t*t*t*g*g*ttttttctctgtattgttttctaagagaagttatttcta                           |
| L50-10-R           | tgcctttttt*t*t*t*t*ttgcttgtgttttccttcagtataaaac                               |
| L50-5-F            | ctttgg*t*t*t*t*ttctctgtattgttttctaagagaagttatttcta                            |
| L50-10-R           | tgcctttttt*t*t*t*t*ttgcttgtgttttccttcagtataaaac                               |
| L50-15-F           | ctttgggtttttctt*c*t*g*t*attgttttctaagagaagttatttcta                           |
| L50-10-R           | tgcctttttt*t*t*t*t*ttgcttgtgttttccttcagtataaaac                               |
| L50-20-F           | ctttgggtttttctctgta*t*t*t*g*ttttctaagagaagttatttcta                           |
| L50-10-R           | tgcctttttt*t*t*t*t*ttgcttgtgttttccttcagtataaaac                               |
| <i>GAPDH</i> locus | EF-1 $\alpha$ core promoter-EGFP primers                                      |
| G50-0-F            | atggcctccaaggagtaagac                                                         |
| G50-0-P-R          | P-actgagtgtggcagggac                                                          |
| G50-0-P-F          | P-atggcctccaaggagtaagac                                                       |
| G50-0-R            | actgagtgtggcagggac                                                            |
| G-50-F             | atggcctccaaggagtaagaccctggaccaccagcccagcaagagcacTAGG<br>TCTTGAAAGGAGTGGG      |
| G-50-R             | actgagtgtggcagggactcccagcagtgagggtctctctctctcttAGGTATC<br>TCTGACCAGAGTC       |
| G-50S-F            | atggcctccaaggagtaagaccctggaccaccagcccagcaagagcacT*A*G<br>*G*T*CTTGAAAGGAGTGGG |
| G-50S-R            | actgagtgtggcagggactcccagcagtgagggtctctctctctcttA*G*G*T<br>*A*TCTCTGACCAGAGTC  |
| G-40S-F            | atggcctccaaggagtaagaccctggaccaccagcccag*c*a*a*g*agcacT<br>AGGTCTTGA           |
| G-40S-R            | actgagtgtggcagggactcccagcagtgagggtctctct*c*t*t*c*ctcttAGG<br>TATCTCT          |
| G-30S-F            | atggcctccaaggagtaagaccctggacca*c*c*a*g*cccagcaagagcac                         |
| G-30S-R            | actgagtgtggcagggactcccagcagtga*g*g*g*t*ctctctctctctt                          |
| G-20S-F            | atggcctccaaggagtaagac*c*c*c*t*ggaccaccagcccac                                 |
| G-20S-R            | actgagtgtggcagggactcc*c*c*a*g*cagtgagggtctctc                                 |
| G-15S-F            | atggcctccaaggagt*a*a*g*a*cccctggaccaccag                                      |
| G-15S-R            | actgagtgtggcaggg*a*c*t*c*cccagcagtgagggt                                      |
| G-10S-F            | atggcctcaa*g*g*a*g*taagaccctggacc                                             |
| G-10S-R            | actgagtgtgg*c*a*g*g*gactcccagcagtg                                            |
| G-5S-F             | atggcc*t*c*c*a*aggagtaagaccct                                                 |
| G-5S-R             | actgag*t*g*t*g*gcagggactcccag                                                 |
| <i>AAVS1</i> locus | EF-1 $\alpha$ core promoter-EGFP primers                                      |
| A50-0-F            | gttctgggtactttatctgtcccc                                                      |
| A50-0-P-R          | P-taggaaggaggaggcctaagg                                                       |

|                  |                                                                           |
|------------------|---------------------------------------------------------------------------|
| A50-0-P-F        | P-gttctgggtacttttatctgtccccc                                              |
| A50-0-R          | taggaaggaggaggcctaagg                                                     |
| A-50-F           | gttctgggtacttttatctgtcccccacacagtgggggcactaggTAGGTCT<br>TGAAAGGAGTGGG     |
| A-50-R           | taggaaggaggaggcctaaggatggggcctttctgtcaccaatcctgtcAGGTAT<br>CTCTGACCAGAGTC |
| A-30S-F          | gttctgggtacttttatctgtcccccacc*c*c*a*c*a                                   |
| A-30S-R          | taggaaggaggaggcctaaggatggggcctt*t*t*c*t*g                                 |
| A-20S-F          | gttctgggtacttttatctgt*c*c*c*c*t                                           |
| A-20S-R          | taggaaggaggaggcctaagg*a*t*g*g*g                                           |
| A-15S-F          | gttctgggtactttta*t*c*t*g*t                                                |
| A-15S-R          | taggaaggaggaggcc*t*a*a*g*g                                                |
| A-10S-F          | gttctgggtac*t*t*t*atctg                                                   |
| A-10S-R          | taggaaggagg*a*g*g*c*ctaag                                                 |
| A-5S-F           | gttctg*g*g*t*a*ctttatctg                                                  |
| A-5S-R           | taggaa*g*g*a*g*gaggcctaag                                                 |
| <i>HBB</i> locus | EF-1 $\alpha$ core promoter-EGFP primers                                  |
| H50-0-F          | tcaaacagacaccatggtgcatc                                                   |
| H50-0-P-R        | P-cagggcctcaccaccaactt                                                    |
| H50-0-P-F        | P-tcaaacagacaccatggtgcatc                                                 |
| H50-0-R          | cagggcctcaccaccaactt                                                      |
| H-50-F           | tcaaacagacaccatggtgcatc                                                   |
| H-50-R           | cagggcctcaccaccaactt                                                      |
| H-30S-F          | tcaaacagacaccatggtgcatctgactcct*g*a*g*g*a                                 |
| H-30S-R          | cagggcctcaccaccaacttcatccacgttc*a*c*c*t*t                                 |
| H-20S-F          | tcaaacagacaccatggtgca*t*c*t*g*act                                         |
| H-20S-R          | cagggcctcaccaccaacttc*a*t*c*c*a                                           |
| H-15S-F          | tcaaacagacaccatg*g*t*g*c*atc                                              |
| H-15S-R          | cagggcctcaccacca*a*c*t*t*c                                                |
| H-10S-F          | tcaaacagaca*c*c*a*t*ggtgcatc                                              |
| H-10S-R          | cagggcctcac*c*a*c*c*aactt                                                 |
| H-5S-F           | tcaaac*a*g*a*c*accatggtgcatc                                              |
| H-5S-R           | cagggc*c*t*c*a*ccaccaactt                                                 |
| Lamin A/C locus  | EF-1 $\alpha$ promoter-EGFP-ploy A signal (2600bp) primers for<br>esgRNA  |
| L-12S-F          | ctttggtttttt*c*t*t*c*tgtattgttttctaagag                                   |
| L-9S-R           | attgagatagatgagatagatgctttttt*t*t*t*t*ttt                                 |
| L-10S-R          | attgagatagatgagatagatgctttttt*t*t*t*t*ttt                                 |
| L-11S-R          | attgagatagatgagatagatgctttttt*t*t*t*t*tt                                  |
| L-12S-R          | attgagatagatgagatagatgctttttt*t*t*t*t*t                                   |
| L-13S-R          | attgagatagatgagatagatgctttttt*t*t*t*t*g                                   |
| L-14S-R          | attgagatagatgagatagatgctttttt*t*t*t*t*g*c                                 |

|         |                                             |
|---------|---------------------------------------------|
| L-15S-R | attgagatagatgagatagatgctttttttttt*t*t*g*c*t |
| L-16S-R | attgagatagatgagatagatgctttttttttt*t*g*c*t*t |

**Table S4.** A list of primer sequence (5'→3') for sgRNA or esgRNA synthesis in this study.

|                  |                                        |
|------------------|----------------------------------------|
| <i>Lamin A/C</i> | sgRNA primers                          |
| L-gRNA-F         | TAATACGACTCACTATAGagagaagtattttctacag  |
| L-gRNA-R         | TTCTAGCTCTAAAACCTGctgtagaaataacttctct  |
|                  |                                        |
| <i>GAPDH</i>     | sgRNA primers                          |
| G-gRNA-F         | TAATACGACTCACTATAGagccccagcaagagcacaag |
| G-gRNA-R         | TTCTAGCTCTAAAACCTGcttgtgctcttgggggct   |
|                  |                                        |
| <i>AAVSI</i>     | sgRNA primers                          |
| A-gRNA-F         | TAATACGACTCACTATAGacagtggggccactagggac |
| A-gRNA-R         | TTCTAGCTCTAAAACCTGgtccctagtggccccactgt |
|                  |                                        |
| <i>HBB</i>       | sgRNA primers                          |
| H-gRNA-F         | TAATACGACTCACTATAGcttgccccacagggcagtaa |
| H-gRNA-R         | TTCTAGCTCTAAAACCTGttactgccctgtggggcaag |
|                  |                                        |
| <i>Lamin A/C</i> | esgRNA primers                         |
| L-esgRNA-F       | TAATACGACTCACTATAGAGAG                 |
| L-esgRNA-R       | TCTATCTCATCTATCTCAATCC                 |

**Table S5.** The template sequence of esgRNA (5'→3') was used in this study (4) (Different colors to distinguish T7 promoter, target sequence, stem-loop region of sgRNA, annealing sequence)

|                                                                                                                                                         |
|---------------------------------------------------------------------------------------------------------------------------------------------------------|
| Template sequence of esgRNA                                                                                                                             |
| TAATACGACTCACTATAGAGAGAAGTTATTTCTACAGGTTTTAGAGCTAG<br>AAATAGCAAGTTAAAATAAGGCTAGTCCGTTATCAACTTGAAAAAGTGGC<br>ACCGAGTCGGTGCAGAAATTAGGATTGAGATAGATGAGATAGA |

**Table S6.** A list of primer sequence (5'→3') for genomic DNA PCR (full length and junctions) in this study. All primers were designed in the Primer-BLAST section of NCBI website (Primer designing tool (<https://www.ncbi.nlm.nih.gov/tools/primer-blast/index.cgi>)).

|                         |                                |
|-------------------------|--------------------------------|
| <i>Lamin A/C</i>        | Primers used in genotyping PCR |
| <i>Lamin A/C</i> 5' FP  | tgctacctcccttctaggggc          |
| <i>Lamin A/C</i> 3' FP  | cgaccactaccagcagaacac          |
| <i>Lamin A/C</i> 5' RP  | cagtttaccgcgcccac              |
| <i>Lamin A/C</i> 3' RP  | gctggcggagaagcctctat           |
|                         |                                |
| <i>Lamin A/C</i> 2500KI | Primers used in genotyping PCR |
| <i>Lamin A/C</i> 5' FP  | tgctacctcccttctaggggc          |
| <i>Lamin A/C</i> 3' FP  | tccttgaccctggaaggtgcca         |
| <i>Lamin A/C</i> 5' RP  | gtctggctccccatgcggg            |
| <i>Lamin A/C</i> 3' RP  | gctggcggagaagcctctat           |
|                         |                                |
| <i>GAPDH</i>            | Primers used in genotyping PCR |
| <i>GAPDH</i> 5' FP      | ctcctctgactcaacagcgac          |
| <i>GAPDH</i> 3' FP      | cgaccactaccagcagaacac          |
| <i>GAPDH</i> 5' RP      | cagtttaccgcgcccac              |
| <i>GAPDH</i> 3' RP      | agtaactggtgagcacagggt          |
|                         |                                |
| <i>AAVSI</i>            | Primers used in genotyping PCR |
| <i>AAVSI</i> 5' FP      | ttctcctgtggattcgggtc           |
| <i>AAVSI</i> 3' FP      | ctggagtacaactacaacagcc         |
| <i>AAVSI</i> 5' RP      | accttctctaggcaccggat           |
| <i>AAVSI</i> 3' RP      | ctctctggctccatcgttaag          |
|                         |                                |
| <i>HBB</i>              | Primers used in genotyping PCR |
| <i>HBB</i> 5' FP        | tttgaagtccaactcctaagcca        |
| <i>HBB</i> 3' FP        | ctggagtacaactacaacagcc         |
| <i>HBB</i> 5' RP        | cagtttaccgcgcccac              |
| <i>HBB</i> 3' RP        | gtcagtcctatcagaaaccaa          |

**Table S7.** A list of sequences (5'→3') for testing of Cas9-PCV2 ssDNA linkers. Upper-case letters are target sequences recognized by PCV2 and lower-case letters are sequences annealed to the 3'-overhang of odsDNA.

|                  |                                                    |
|------------------|----------------------------------------------------|
| <i>Lamin A/C</i> | Cas9-PCV2 ssDNA linker sequences                   |
| PCV2-5           | AAGTATTACCAGAAAtgctt                               |
| PCV2-10          | AAGTATTACCAGAAAtgctttttt                           |
| PCV2-15          | AAGTATTACCAGAAAtgcttttttttt                        |
| PCV2-20          | AAGTATTACCAGAAAtgctttttttttttgc                    |
| PCV2-30          | AAGTATTACCAGAAAtgctttttttttttgcttgtgtttt           |
| PCV2-40          | AAGTATTACCAGAAAtgctttttttttttgcttgtgttttccttcagtat |

|         |                                                                 |
|---------|-----------------------------------------------------------------|
| PCV2-50 | AAGTATTACCAGAAAAtgcttttttttttttggctgtgttttctcctcagtataaaaccactg |
|---------|-----------------------------------------------------------------|

**Table S8.** The sequences (5'→3') of fluorescent ssDNA strands for labeling.

| Name           | sequences                                                                         |
|----------------|-----------------------------------------------------------------------------------|
| PCV2-linker-QF | 5' BHQ1-TAAGTATTACCAGAAA/i6FAMdT/cctcttgcctccacagatatacagaacctgacctgacctgtaccagct |
| esgRNA-RC      | 5' Cy5-AAAAAAAGCATCTATCTCATCTATCTCAAT                                             |

**Table S9.** The plasmid sequence for Cas9-PCV2 fusion protein expression and purification. Cas9-PCV2 protein-coding sequences are underlined.

| <b>pET28b-3×NLS-Cas9-NLS-PCV2-6×His</b>                                                                                                                                                                                                                                                                                                                                                                                                                                                                                                                                                                                                                                                                                                                                                                                                                                                                                                                                                                                                                                                                                                                                                                                                                                                                                                                                                                                                                                                                                                                                                                                                                                                                                                                                                                                                                                                                                                                                                                                                                                                                                                                                                                                                                                                                                                                                                                                                                                                                                                                                                                                                                                                                                                                                                                                                                                                                                                                                                                                                                                                                                                                                                                                                                     |
|-------------------------------------------------------------------------------------------------------------------------------------------------------------------------------------------------------------------------------------------------------------------------------------------------------------------------------------------------------------------------------------------------------------------------------------------------------------------------------------------------------------------------------------------------------------------------------------------------------------------------------------------------------------------------------------------------------------------------------------------------------------------------------------------------------------------------------------------------------------------------------------------------------------------------------------------------------------------------------------------------------------------------------------------------------------------------------------------------------------------------------------------------------------------------------------------------------------------------------------------------------------------------------------------------------------------------------------------------------------------------------------------------------------------------------------------------------------------------------------------------------------------------------------------------------------------------------------------------------------------------------------------------------------------------------------------------------------------------------------------------------------------------------------------------------------------------------------------------------------------------------------------------------------------------------------------------------------------------------------------------------------------------------------------------------------------------------------------------------------------------------------------------------------------------------------------------------------------------------------------------------------------------------------------------------------------------------------------------------------------------------------------------------------------------------------------------------------------------------------------------------------------------------------------------------------------------------------------------------------------------------------------------------------------------------------------------------------------------------------------------------------------------------------------------------------------------------------------------------------------------------------------------------------------------------------------------------------------------------------------------------------------------------------------------------------------------------------------------------------------------------------------------------------------------------------------------------------------------------------------------------------|
| <p>agcgcctgatcgggtattttctccttacgcatctgtcgggtatttcacaccgcaatggtgcaactcagtaaatctgctctgatgccgcatagtaagccagtatacac<br/> tccgctatcgtactgactgggtcatggctgcgccccgacaccgccaacccccgctgacgcgcctgacgggcttctgctcccggcatccgcttacagac<br/> aagctgtgacctctccgggagctgcatgtgctagaggtttaccgctacaccgaaacgcgcgagggcagctgaggtaaacctcatcagctgctgctggaac<br/> gattcacagatgtcctgttcatccgctccagctcgttggatttccagaagcgttaattgtctggcttctgataaagcgggccaatgtaagggcgggttttctgt<br/> ttggtcactgatgcctcctgtaaggggatttctgtcatggggtaatgataccgatgaaacgagagaggatgctcacgatacgggttactgatgatgaacatgc<br/> ccggttactggaacgttctgagggtaacaactgcccgtatggatgcggcgggaccagagaaaaatcactcagggtcaatgccagcgtctgtaatacagatgt<br/> agggttccacagggtagccagcagcatcctgcgatcagatccggaacataatggtgcaggcgcctgacttccgcgttccagactttacgaaacccggaac<br/> cgaagaccattcatgttctcaggtcgcagacgtttgacagcagctgcttccagctcgcgfatcgggtattcattctgtaaccagtaaggaaccccc<br/> gccagcctagccgggtcctcaacgacagggagcagcatcgcgaccctggggccccaatgcccggcgataatggcctgcttctcggcaaacgttgggtggc<br/> gggaccagtgcgaagcctgagcagggcgtgcaagattccgaataccgaagcagagccgatcctgcgctccagcgaagcggctcctcggcga<br/> aaatgaccagagcgtcggcgcacctgctcactgagttgcatgataaagaagacagtcataatgcccggcgacgatagtcatgccccggcccaccggaagga<br/> gctgactgggtgaaggctcgaaggcctcggctcggatccgggtcctaatgagtgagtaactacattaattgctgctcactgcccgttccagtcgg<br/> gaaacctgctgcccagctgcaatgaatgccaacgcggggagaggcgttctgctattggggcaggggtggtttttttaccagtgagacgggc<br/> aacagctgattgcccctaccgctggccctgagagagttgcaagaagcgtccagcgtggttggcccagcaggcgaatcctgttggatggtgtaaacggc<br/> gggataaactgagctgcttctggtatcgtgatccactaccagatataccgaccaacgcgagcccggactcggtaatggcgcgattgcccagcggc<br/> atctgatcgttggcaaccagatcgcagtggaacgatccctcattcagatgttgggttggaaaccggacatggcactccagtcgcttcccgttccgt<br/> atcggctgaattgattgagtgagatattatgccagccagccagacgcagcgcggagacagaactaatggcccgcctaacagcgcgattgctggtga<br/> cccaatgcgaccagatgctccagcccagtcgctaccgttctatgggagaaaaataactgttggatgggtgctgctcagagacataagaataacggcga<br/> acattagtcaggcagctccacagcaatggcatcctggtcaccagcggatgtaatgatcagcccactgacgctgctgagagaagattgtcaccgcccgtt<br/> tacaggcttcgacggcctgcttctaccatcgacaccaccagctgacccaggtgatcggcgcgagattaatcggcgcgacaattgacggcgcgctgca<br/> ggccagactggaggtggcaacccaatcagcaacgactgttggcccaggttgggtgcccacgcggttgggaatgtaattcagctccgcatcggcgttcca<br/> cttttcccgttttcgagaaactggctggcctggtcaccacgcggaaacggctgataagagacaccggcactactctgcgacatcgataacgttactggtt<br/> tcacattcaccacctgaattgactctctccggcgcctatcgcataaccgcaaggttttgcgcaatcagatggtgtccgggatcctgacgctctccttatg<br/> actcctcattaggaagcagcccagtagtaggttggcggctgagcaccgcccgaaggaatggtgatgcaaggagatggcggccaacagctccccgg<br/> ccacgggctgcccaccatacccagcgaacaagcgtctatgcccgaagtggcggagcccgatcttcccacggtgatgctggcgatagggccag<br/> caaccgacctgtggcgggtgatccggccacgatcgtccggcgtagaggatcagatctcgcgaaatataacgactactataggggaattgt<br/> gagcggataaactcccctctagaaataatttttaactttaagaaggagatatac<u>gccaagaaaaaaagaaagtttctctgctggatcctaaaaaagaaac</u><br/> <u>ggaagtgtctcggcagatccgaaaaaaacgcaaggttgcggcgcactcagatggacaagaagtactccattggctcgatacggcacaacacgcgt</u><br/> <u>cggctggcctcattacggagctgacaggtccagcaaaaaattcaaatcttggcaataccgatccacagcataaagaagacctattggcggcc</u><br/> <u>ctctgtcactccgggagacgcccgaagccacgcgctcaaaagaaacagcgcgcgagatataccgcagaagaatcgatctcactctcagagaa</u></p> |



tctftagtaatgagatggctaaggtgatgactcttctccatagctggaggagctcttfttggaggaggataaaaagcacgagccacccaatctftggca  
atctgctggcagaggtggcgtaccatgaaaagtacccaacatatactatctgaggaagaagctftgagacagctgataaagctgactgctggtgatctatctc  
gcgctggcgcataatgatcaaaatctggggacactctctatcgaggggacctgaacccagacaacagcgtatgacaaaactcttatacaactggtcagactf  
acaatcagcttctgaagagaaacccgatcaacgcacccgaggtgacgccaagaactctgagcctgagctgtccaaatcccgcgctcgaaaacctcacc  
gcacagctccctgggagagaagaacggcctgttggtaactctatcgccctgctactcggcctgaccccaactfataactcgcactgcccgaagatg  
ccaagctcaactgagcaaaagacacctacgatgatctcgacaactctgctgcccagatcggcgaccagctacgcagacctttttggcgcaaaagacctg  
agagccactctgctgagtgatattctgagtgaaacggagatcaccaaaagctccgctgagcctgtagatgcaagcctgtagagaccaccaagactf  
gacttctgaaagccctgtcagacagcaactgctgagaagtacaaggaaatctctgctacgtctaaaaatggctacgccggatactgacggcgagca  
agccaggaggaatfttacaatfttaagcccaactctggaaaaaatgacggcaccgaggagctgctgtaaagcttaacagagaagatctgtgcaaacag  
cgcactctgacaatggaagcatccccaccagattcactgaggcaactgcacgctatctcagcggcaagaggattctacccttttgaagataacaggg  
aaaagatgagaaaaatctcacattctgataccctactatgtagccccctgcccgggaaatccagatcgcgtgagactcgaatcagaagagacct  
cactccctggaactcaggaagctggtgataaggggcccctgcccagctctcatgaaagatgactaactttgataaaaatcgcctaacgaaaagtgctfc  
ctaaactctctctgctgacgagctactcagcttataacgagctcacaaggtcaaatcgtcacagaaggatgagaagccagcattctctgctggagagca  
gaagaaagctatctggacctctctcaagacgaaccggaaggtaccgtgaaacagctcaaaagaagactatttcaaaaagattgaatgttctgactctgtgaaat  
cagcggagtgaggatcctcaacgcacccctgggaactgatcagatctcctgaaatcattaaagacaaggactcctgacaatgaggagaacgagagaca  
tcttgagacattgctcaccctacgttfttgaagataggagatgattgaaacgctgaaaactacgctcatctctcagcagcaaaatcatgaaacagct  
caagagcggcgcatacagatggggcggctgcaagaaactgatcaatgggatccgagacaagcagagtgaaagacaatcctgatttttaagtccg  
atggattccaaccggaactcatgagttgatccatgatgactctcactttaaaggagacatcagaagcacaagttctggccagggggacagctctcac  
gagcactcgtcaatctgaggtagcccagctatcaaaaaggaactcagacccgttaaggctggtgatgaactcgtcaaaatgaaaggcagataagccc  
gagaatctgttatcgagatggcccagagaacaaactaccagaaggacagaagaacagtaggaaaggatgaagagattgaaagggtataaaaga  
actggggtcccaaatccttaaggaacaccaatgaaaacaccagctcagaatgagaagctctactctgactcctcagaacggcaggacatgtacgtgga  
tcaggaactggacatcaatcggctcctccgactacgacgtgatcatatctgccccagcttcttcaaaagatgattctattgataaaaatgttgacaagatccgat  
aaaaatagagggaagatgataacgtcccctcagaagaagttgcaagaaaatgaaaaatattggcggcagctgctgaacgcaaaactgatcacacaacgaa  
gttcgataatctgactaagctgaacaggtggcctgctgagttgataaagccgctcatcaaaaagcagctgttgagacacgccagatcaccaaagcagct  
ggcccaaatctcgaatcagcatgaacaccaagctacgatgaaatgacaaactgattcagaggtgaaagtattactctgaagtctaaagctgtctca gattcag  
aaaggacttctagtttataagtgagagatcaacaattaccacatcgcgatgatgcctacctaafgagctggtgagcactgcaattatcaaaaaatcccaa  
gcttgaatctgaattgtttacggagactataaagtgtacgatgtagaaaatgatcgaagctgagcaggaataagcgaagccaccgctaagtactcttttac  
agcaatattgaattttcaagaccgagattacactggccaatggagagattcggaaagcaccactatcgaacaaacggagaacaggagaatctgtg  
gacaaggtaggattcggcagactccgaaagctctgctccatccgcaggtgaacatcgttaaaaagaccgaagtacagaccggagcttccaagaaa  
gtatcctcccgaaggaacagcgaagctgatcgcacgcaaaaaagattggaccccaagaatacggcggatctcctacagctcgttacagctac  
tggttggtccaaaatgtagaagggaaatctaaaaaactcaaaagctcaaggaactctgggcatcacaatcatgagcgaatcaagctcgaaaaaacccc  
atcgacttctcgaagcgaagataaaagaggtcaaaaaagacctatcattaaagcttccaagtactctctttagcttgaaaacggccgaaacgaatgct  
cgtagtgccggcgagctgcagaaggtaacgagctggcactgcccctaaatacgttaattctgtatctggccagccactatgaaaagctcaaaaggctccc  
gaagataatgagcagaagcagctgtctggaacaacacaaactacctgatgatgatcagcaataagcgaattctcaaaaagatgatctcggcag  
gctaacctcgaataaggtcttctgcttacaataagcacaggataagcccatcaggagcagcagaaaaatcactctgttactctgaccaactggcgc  
gctcagcctcaagactctgacaccaccatagacagaagcggctacacctctcaaaaggagctctggacgccaactgattcatcagtaattacgggct  
ctatgaaacaagaatgacctctcagctcggtgagactctgagagatctagcggagatcctctggcccaagaagaagaggatggcggcagcag  
cggcggcagcagctcagctcccgagcaaaaaaacgctgtagcgtccgcagccgataaacgttgggttttaccctgaataatccgagcgaagatgag  
cgcaaaaaatccgtgatcggcattgctgtcatttctggtggaagaggtaacgaagaagctgtacaccgcatctcaggggttttcaaatttgt  
taaaaaacagacttcaaaaatgaaatggtatctgggtgcccgttcgcaatgtaaaaaaagcaccgatcagcagaacaaagaatattgtagcaaga  
aggcaacctctgtaggaatggtgaccgcgtgaccaggtcagcgtcaccaccaccaccactgagatccgctgtaacaaagcccgaaggaagc  
tgagttgctgctgccaccgctgagcaataactagcataaccctggggcctcaaacggcttgggggttttctgaaaggaggaactatccgattgg  
cgaatgggacgcacctgtagcggcgaatagcggcgggtggtgttacgcgagcgtgaccgctacactgcccagcgcctgagcccgtccttct  
gcttcttccctcttctcggcagctcggcgttcccgtcaagcttaaatcggggctcccctttaggggtccgattagcttaccggcacctcgaacccaaa

aaacttgattagggatggttcacgtagtgggccatcgccctgatagacgggttttcgcccttgacgtggagtcacgttcttaatagtgactctgttccaaact  
ggaacaacactcaaccctatctcggctctattctttgatattataaggattttccgatttcggcctattggttaaaaaatgagctgatatacaaaaatttaacgcgaatt  
taacaaaatattaacgcttacaatttaggtggcacttttcgggaaatgtgcgcggaaccctattgtttatttttaataacattcaaatatgatccgctcatgaatta  
attcttagaaaaactcatcgagcatcaaatgaaactgcaatttattcatatcaggattatcaataccatattttgaaaaagccgftctgtaatgaaggagaaaaactcac  
cgaggcagttccatagatggcaagatcctggatcggctgctgattccgactcgtccaacatcaatacaacctattaatttcccctcgtcaaaaaaaggttatcaa  
gtgagaaatcacatgagtgacgactgaatccggfagaatggcaaaagtattgatttcttcagactgttcaacaggccagccattacgctcgtcatcaaaaat  
cactcgcatacaaaaaccgtattcattcgtgattgcgctgagcgagacgaaatcgcgacgctgttaaaaggacaattacaacaggaaatgaaatgcaaccg  
gcgcaggaaactgcagcgcatacaaatattttcacctgaatcaggatattcttaataacctggaatgctgttttccggggatcgcagtggtgagtaaccatgc  
atcatcaggagtagcagataaaatgcttgatggtcggaagaggcataaattccgtcagccagtttagtctgacctctcatctgtaacatcattggcaacgctacctttg  
ccatgtttcagaacaaactcggcgcacggtctccatacaatcagatgattgctgcacctgattgccgacattatcgcgagccattataaccatataaatcag  
catccatgttgaatttaacgcgccctagagcaagacgttcccgftgaaatggctcataaacaccctgtattactgtttatgtaagcagacagttttattgttcatga  
ccaaaaatcccttaacgtgagtttcttccactgagcgtcagaccccgtagaaaagatcaaaagatctcttgagatccttttttctgcgcgtaactctgctgctgcaaa  
caaaaaaccaccgctaccagcgggtgttggcttccggatcaagagctaccaactcttttccgaagtaactggctcagcagagcgcagataccaanaactgtc  
cttctagttagccgtagtaggcccaccattcaagaactctgtagaccgcctacatactcgtctgtaactctgttaccagtggtcgtcagcagtggtgataag  
tcgtgttaccgggttgactcaagacgatattaccgataagggcagcggctgggctgaacggggggtcgtgcacacagcccagcttgaggcgaacga  
cctacaccgaactgagatacctacagcgtgagctatgagaaagcggcagcctcccgaaagggagaaagggcggacaggtatccggtaagcggcagggctgga  
acaggagagcgcagcaggggactccaggggaaacgctggtatcttatagtcctgctggggttcgccacctgactgagcgtcgtatgttgatgctcgtc  
agggggggcggagcctatgaaaaacgccagcaacgcggccttttacggctcctggccttttgcctgttctcacatgttcttctcgttaccctgattctg  
tgataaccgtattaccgctttgagtgagctgataccgctcggcagcggcaacgaccgagcgcagcagtgagcagggaaagcgggaag

**Table S10.** The odsDNA overhang sequences (5'→3') tested for various loci and the corresponding  $T_m$  values.

| Locus            | Overhang length (nt)        | DNA sequence        | $T_m$ (°C) |
|------------------|-----------------------------|---------------------|------------|
| <i>Lamin A/C</i> | 5                           | ctttg               | 14         |
|                  | 8                           | ctttggtt            | 22         |
|                  | 9                           | ctttggttt           | 24         |
|                  | 10                          | ctttggtttt          | 26         |
|                  | 11                          | ctttggttttt         | 28         |
|                  | 12                          | ctttggtttttt        | 30         |
|                  | 13                          | ctttggttttttt       | 32         |
|                  | 14                          | ctttggtttttttc      | 36         |
|                  | 15                          | ctttggtttttttct     | 38         |
|                  | 16                          | ctttggtttttttctt    | 40         |
|                  | 17                          | ctttggtttttttcttc   | 44         |
|                  | 18                          | ctttggtttttttcttct  | 46         |
|                  | 19                          | ctttggtttttttctctg  | 50         |
|                  | 20                          | ctttggtttttttctctgt | 52         |
| 30               | ctttggtttttttctctgtattgtttt | 64                  |            |
| <i>GAPDH</i>     | 5                           | atggc               | 16         |
|                  | 10                          | atggcctcca          | 32         |
|                  | 15                          | atggcctccaaggag     | 48         |

|              |    |                                |    |
|--------------|----|--------------------------------|----|
|              | 20 | atggcctccaaggagtaaga           | 60 |
|              | 30 | atggcctccaaggagtaagaccctggacc  | 68 |
| <i>AAVSI</i> | 5  | gttct                          | 14 |
|              | 10 | gttctgggta                     | 30 |
|              | 15 | gttctgggtactttt                | 42 |
|              | 20 | gttctgggtacttttatctg           | 56 |
|              | 30 | gttctgggtacttttatctgtcccctccac | 62 |
| <i>HBB</i>   | 5  | tcaaa                          | 12 |
|              | 10 | tcaaacagac                     | 28 |
|              | 15 | tcaaacagacaccat                | 42 |
|              | 20 | tcaaacagacaccatggtgc           | 60 |
|              | 30 | tcaaacagacaccatggtgcatctgactcc | 64 |

**Table S11.** The synthesized ssDNA sequences (5'→3') used for strand-annealing to form short dsDNA and odsDNA donors (\* indicates phosphorothioate modification and the insertion sequences are highlighted in red).

|                                           |                                                                                                                          |
|-------------------------------------------|--------------------------------------------------------------------------------------------------------------------------|
| <i>Lamin A/C</i> dsDNA<br>HDR indel-F     | CTTTGGTTTTTTTTCTTCTGTATTTTTTTTTTCTAAGAGA<br>AGTTATTTTCTAgaattcCAGTGGTTTTATACTGAAGGAA<br>AAACACAAGCAAAAAAAAAAAAAAAAAAGCAT |
| <i>Lamin A/C</i> dsDNA<br>HDR indel-R     | ATGCTTTTTTTTTTTTTTGTGTTTTTCCTTCAGT<br>ATAAAACCACTGgaattcTAGAAAATAACTTCTCTTAGA<br>AAAAAAAAATACAGAAGAAAAAAAAACCAAAG        |
| <i>Lamin A/C</i><br>odsDNA HDR<br>indel-F | T*T*T*C*T*TCTGTATTTTTTTTTTCTAAGAGAAGTTAT<br>TTTCTAgaattcCAGTGGTTTTATACTGAAGGAAAAACA<br>CAAGCAAAAAAAAAAAAAAAAAAGCAT       |
| <i>Lamin A/C</i><br>odsDNA HDR<br>indel-R | T*T*T*T*T*TTTGTGTTTTTCCTTCAGTATAAAA<br>CCACTGgaattcTAGAAAATAACTTCTCTTAGAAAAAAA<br>AATACAGAAGAAAAAAAAACCAAAG              |
| <i>GAPDH</i> dsDNA<br>HDR indel-F         | ATGGCCTCCAAGGAGTAAGACCCCTGGACCACCAGC<br>CCCAGCAAGAGCACgaattcAAGAGGAAGAGAGAGAC<br>CCTCACTGCTGGGGAGTCCCTGCCCACTCAGT        |
| <i>GAPDH</i> dsDNA<br>HDR indel-R         | ACTGAGTGTGGCAGGGACTCCCCAGCAGTGAGGGT<br>CTCTCTTCTCTTgaattcGTGCTCTTGCTGGGGCTG<br>GTGGTCCAGGGGTCTTACTCCTTGGAGGCCAT          |
| <i>GAPDH</i> odsDNA<br>HDR indel-F        | A*G*G*A*G*TAAGACCCCTGGACCACCAGCCCCAGC<br>AAGAGCACgaattcAAGAGGAAGAGAGAGACCCTCAC<br>TGCTGGGGAGTCCCTGCCCACTCAGT             |
| <i>GAPDH</i> odsDNA<br>HDR indel-R        | G*C*A*G*G*GACTCCCCAGCAGTGAGGGTCTCTCTC<br>TTCCTCTTgaattcGTGCTCTTGCTGGGGCTGGTGGTCC<br>AGGGGTCTTACTCCTTGGAGGCCAT            |

**Table S12.** Primer sequences (5'→3') for indels detection by amplicon-seq analysis. (Red is the index sequence.)

|                          |                                                           |
|--------------------------|-----------------------------------------------------------|
| <i>Lamin A/C</i> Indel F | CCCTACACGACGCTCTTCCGATCTGAAGCCAAAGAA<br>AAATAACCCTT       |
| <i>Lamin A/C</i> Indel R | GTGACTGGAGTTCAGACGTGTGCTCTTCCGATCGGT<br>TTAAGGCAGATGTGGA  |
| <i>GAPDH</i> indel F     | CCCTACACGACGCTCTTCCGATCTCCCTGACAACCTCT<br>TTCATCTTC       |
| <i>GAPDH</i> indel R     | GTGACTGGAGTTCAGACGTGTGCTCTTCCGATCTCA<br>AGGGGTCTACATGGCAA |
| I5comm                   | AATGATACGGCGACCACCGAGATCTACACTCTTTCCC<br>TACACGACGCTCTTC  |
| SIP01                    | CAAGCAGAAGACGGCATAACGAGATCGTGATGTGACT<br>GGAGTTCAGACG     |
| SIP02                    | CAAGCAGAAGACGGCATAACGAGATACATCGGTGACT<br>GGAGTTCAGACG     |
| SIP03                    | CAAGCAGAAGACGGCATAACGAGATGCCTAAGTGACT<br>GGAGTTCAGACG     |
| SIP04                    | CAAGCAGAAGACGGCATAACGAGATTGGTCAGTGACT<br>GGAGTTCAGACG     |
| SIP05                    | CAAGCAGAAGACGGCATAACGAGACTACTGTGTGACT<br>GGAGTTCAGACG     |
| SIP06                    | CAAGCAGAAGACGGCATAACGAGATATTGGCGTGACT<br>GGAGTTCAGACG     |
| SIP07                    | CAAGCAGAAGACGGCATAACGAGATGATCTGGTGACT<br>GGAGTTCAGACG     |
| SIP08                    | CAAGCAGAAGACGGCATAACGAGATCAAGTGTGACT<br>GGAGTTCAGACG      |
| SIP09                    | CAAGCAGAAGACGGCATAACGAGACTGATCGTGACT<br>GGAGTTCAGACG      |
| SIP10                    | CAAGCAGAAGACGGCATAACGAGATAAGCTAGTGACT<br>GGAGTTCAGACG     |

**Table S13.** Primer sequences (5'→3') for off-target detection by GIS-seq. (Red is the index sequence.)

|           |                                                                             |
|-----------|-----------------------------------------------------------------------------|
| GIS-101   | 5Phos-GATCGGAAGAGC*C*A                                                      |
| GIS-102-L | AATGATACGGCGACCACCGAGATCTACACGTAAGGAGAC<br>ACTCTTTCCCTACACGACGCTCTTCCGATC*T |
| GIS-102-G | AATGATACGGCGACCACCGAGATCTACACTAGATCGCAC<br>ACTCTTTCCCTACACGACGCTCTTCCGATC*T |

|                  |                                                                    |
|------------------|--------------------------------------------------------------------|
| GIS-200          | AATGATACGGCGACCACCGAGATCTAC                                        |
| GIS-201-L        | CTCTAGGCACCGGATCAATTGCCGAC                                         |
| GIS-202-L        | CCCCAACGAGAAGCGCGATCACA                                            |
| GIS-203(GIS-200) | AATGATACGGCGACCACCGAGATCTAC                                        |
| GIS-204-L        | CCTCTCTATGGGCAGTCGGTGACCAACTTCTCGGGGACTGT                          |
| GIS-205-L        | CCTCTCTATGGGCAGTCGGTGAGTCCTGCTGGAGTTCGTGA                          |
| GIS-201-G        | GCACCGGATCAATTGCCGACCCCT                                           |
| GIS-202-G        | GTCCGCCCTGAGCAAAGACCCCAA                                           |
| GIS-204-G        | CCTCTCTATGGGCAGTCGGTGAAACTTCTCGGGGACTGTG                           |
| GIS-205-G        | CCTCTCTATGGGCAGTCGGTGAATCACATGGTCCTGCTGG                           |
| GIS-301          | CAAGCAGAAGACGGCATAACGAGATTCGCCTTAGTGACTGGAGTCCTCTCTATGGGCAGTCGGTGA |
| GIS-302          | CAAGCAGAAGACGGCATAACGAGATCTAGTACGGTGACTGGAGTCCTCTCTATGGGCAGTCGGTGA |
| GIS-303          | CAAGCAGAAGACGGCATAACGAGATTTCTGCCTGTGACTGGAGTCCTCTCTATGGGCAGTCGGTGA |
| GIS-304          | CAAGCAGAAGACGGCATAACGAGATGCTCAGGAGTGACTGGAGTCCTCTCTATGGGCAGTCGGTGA |
| GIS-305          | CAAGCAGAAGACGGCATAACGAGATAGGAGTCCGTGACTGGAGTCCTCTCTATGGGCAGTCGGTGA |
| GIS-306          | CAAGCAGAAGACGGCATAACGAGATCATGCCTAGTGACTGGAGTCCTCTCTATGGGCAGTCGGTGA |
| GIS-307          | CAAGCAGAAGACGGCATAACGAGATGTAGAGAGGTGACTGGAGTCCTCTCTATGGGCAGTCGGTGA |
| GIS-308          | CAAGCAGAAGACGGCATAACGAGATCCTCTCTGGTGACTGGAGTCCTCTCTATGGGCAGTCGGTGA |

## SI References

1. Y. Yu *et al.*, An efficient gene knock-in strategy using 5'-modified double-stranded DNA donors with short homology arms. *Nat. Chem. Biol.* **16**, 387-390 (2020).
2. K. N. Lovendahl, A. N. Hayward, W. R. Gordon, Sequence-Directed Covalent Protein-DNA Linkages in a Single Step Using HUH-Tags. *J. Am. Chem. Soc.* **139**, 7030-7035 (2017).
3. N. L. Malinin *et al.*, Defining genome-wide CRISPR-Cas genome-editing nuclease activity with GUIDE-seq. *Nat. Protoc.* **16**, 5592-5615 (2021).
4. A. V. Anzalone *et al.*, Search-and-replace genome editing without double-strand breaks or donor DNA. *Nature* **576**, 149-157 (2019).
